# Supplementary material for: Expression Profiling of Circulating MicroRNAs in Canine Myxomatous Mitral Valve Disease
Source: Int J Mol Sci. 2015 Jun 19;16(6):14098–108. doi: 10.3390/ijms160614098 (PMC4490541; doi:10.3390/ijms160614098)
Supplement: Supplementary file 1 [file ijms-16-14098-s001.xlsx]

## Sheet: Table S1
Table S1. Normalized expression data of 277 canine miRNAs.
miRNA Name	StageA_1	StageA_2	StageA_3	StageA_4	StageA_5	StageA_6	StageB_1	StageB_2	StageB_3	StageB_4	StageB_5	StageB_6	StageC_1	StageC_2	StageC_3	StageC_4	StageC_5	StageC_6
cfa-miR-383	1.56217	0.576561	0.868755	0.406097	0.819048	0.819048	2.17372	2.17372	1.18626	0.382038	0.740164	1.23992	0.939921	2.28727	1.98531	8.92852	1.73944	0.629372
cfa-miR-129	0.186011	1.05461	0.228077	1.55144	0.733795	0.733795	0.251135	0.251135	0.414882	0.267818	0.250061	0.331344	0.182913	0.160019	0.26451	0.0442016	0.378218	0.467613
cfa-miR-135a-5p	0.220124	0.0321073	0.24045	0.0246392	0.0644877	0.0644877	0.348503	0.348503	0.105043	0.0385245	0.0848832	0.142877	0.443012	0.277728	0.417523	1.142	0.304296	0.0499214
cfa-miR-632	0.0091937	0.0321073	0.0491964	0.0246392	0.0237378	0.0237378	0.0146825	0.0146825	0.0288038	0.0234822	0.0242416	0.0570881	0.0161089	0.0238343	0.0286771	0.00885179	0.0171798	0.0346641
cfa-miR-219-3p	0.0245574	0.109993	0.0491964	0.0727303	0.0587476	0.0587476	0.0102935	0.0102935	0.0273075	0.0150817	0.0258539	0.0273171	0.0190072	0.0201076	0.0176223	0.00511278	0.0296458	0.0778523
cfa-miR-494	0.129181	0.223496	0.130462	0.351391	0.260833	0.260833	0.173415	0.173415	0.397787	0.0563949	0.0894367	0.298806	0.120538	0.100165	0.162168	0.0994897	0.388317	0.352859
cfa-miR-208b	0.0477217	0.12483	0.127805	0.199209	0.143229	0.143229	0.0540183	0.0540183	0.142431	0.0419767	0.0494071	0.115816	0.0531574	0.0492639	0.0623086	0.0224548	0.102585	0.114038
cfa-miR-874	13.1083	37.9517	7.43887	32.3617	29.7231	29.7231	6.61445	6.61445	12.0291	9.01772	8.84395	14.1444	7.43874	8.14507	6.41784	1.02417	9.13362	11.4352
cfa-miR-449	0.0091937	0.0321073	0.0491964	0.0246392	0.0143914	0.0143914	0.00989478	0.00989478	0.0175408	0.00677694	0.0111151	0.0237308	0.00547726	0.00571748	0.0105936	0.00491137	0.00830673	0.0139703
cfa-miR-451	1082.7	266.493	789.459	410.544	317.973	317.973	342.611	342.611	1150.89	3422.88	1356.93	1901.6	1021.46	888.476	1008.2	135.416	808.545	2280.33
cfa-miR-9	0.0091937	0.0321073	0.0491964	0.18117	0.0143914	0.0143914	0.0127016	0.0127016	0.0251544	0.00677694	0.0127093	0.0363191	0.0138494	0.027468	0.0386029	0.0142246	0.0202802	0.193905
cfa-miR-187	0.163557	0.805173	0.500975	0.409145	0.245407	0.245407	0.265569	0.265569	0.31387	0.132481	0.210322	0.235001	0.104335	0.179886	0.241213	0.0494585	0.203924	0.224347
cfa-miR-26a	5.76348	1.1089	3.16902	1.08116	3.03105	3.03105	7.00411	7.00411	4.27985	1.902	2.37777	2.1705	5.82459	12.7289	8.46835	37.5464	5.52978	2.63669
cfa-miR-761	0.0636894	0.314457	0.0491964	0.534673	0.408101	0.408101	0.0740595	0.0740595	0.177831	0.0884617	0.110932	0.135304	0.0473325	0.0367107	0.103291	0.0160314	0.229108	0.228992
cfa-miR-1837	0.346586	0.947205	0.574993	0.821051	0.53675	0.53675	0.230829	0.230829	0.758656	0.164581	0.23599	0.549485	0.180559	0.13042	0.379333	0.0405706	0.320146	0.408869
cfa-miR-331	2.38027	0.204597	1.24396	0.203119	0.796709	0.796709	3.85487	3.85487	1.43612	0.885546	1.19038	1.07429	1.99884	2.57113	3.07941	8.44728	1.78246	0.884312
cfa-miR-146a	2.74235	13.8557	1.38974	3.0516	1.71259	1.71259	1.38305	1.38305	2.48096	1.21147	1.68081	1.80726	1.44354	2.08727	0.908875	0.368763	1.42071	2.09827
cfa-miR-429	1.32292	3.22122	7.47442	2.92294	1.1603	1.1603	0.885288	0.885288	1.86216	0.875447	0.884843	2.27995	0.543301	0.727046	1.40838	0.181139	0.985595	1.60017
cfa-miR-872	0.0091937	0.0321073	0.583325	0.971316	0.995516	0.995516	1.7931	1.7931	3.96844	0.0157487	0.227705	1.80135	0.728388	0.6359	1.23627	0.169673	1.29105	2.50368
cfa-miR-34c	0.0121502	0.0461451	0.0491964	0.0246392	0.0206245	0.0206245	0.00989478	0.00989478	0.0669585	0.00917137	0.0111212	0.0298952	0.00974293	0.0128901	0.0225389	0.00519117	0.0110126	0.0161297
cfa-miR-367	0.0091937	0.0321073	0.0491964	0.0246392	0.0143914	0.0143914	0.00989478	0.00989478	0.0175408	0.00677694	0.0111151	0.0237308	0.00547726	0.00571748	0.0105936	0.00162004	0.00830673	0.0139703
cfa-miR-181b	0.614227	0.39757	0.197233	0.269622	0.407528	0.407528	0.377098	0.377098	0.326605	0.20137	0.433959	0.259946	0.348	0.415036	0.160669	0.666584	0.314608	0.272503
cfa-miR-411	0.717241	3.65804	0.168075	4.7335	2.6809	2.6809	0.51748	0.51748	1.48192	0.64079	0.729141	1.28443	0.426214	0.287288	0.959688	0.0736654	1.12371	1.4133
cfa-miR-96	0.0091937	0.0321073	0.0491964	0.0246392	0.0143914	0.0143914	0.00989478	0.00989478	0.0175408	0.00677694	0.0111151	0.0237308	0.00547726	0.00571748	0.0105936	0.00555591	0.00830673	0.0139703
cfa-miR-10a	0.944273	1.2473	1.37059	1.05139	0.924473	0.924473	1.24172	1.24172	0.83836	0.675889	1.27891	0.787697	2.03797	1.6397	0.945162	1.41013	1.56532	1.95372
cfa-miR-27b	5.53823	6.30311	9.45591	5.88668	7.73058	7.73058	8.93467	8.93467	4.87603	4.98576	8.21658	5.50838	10.304	6.5799	5.97872	17.401	5.87427	4.23506
cfa-miR-206	0.0379113	0.156197	0.301842	0.160433	0.124095	0.124095	0.0356323	0.0356323	0.0911402	0.0404408	0.0678049	0.0950883	0.108987	0.207211	0.169973	0.0308338	0.174867	0.409847
cfa-miR-375	0.504462	1.93063	1.4583	1.50016	0.859164	0.859164	0.544639	0.544639	1.42648	0.342815	0.572337	0.992048	0.270978	0.343648	0.574197	0.115864	0.372507	0.644252
cfa-miR-504	0.0091937	0.0321073	0.0491964	0.0246392	0.0143914	0.0143914	0.00989478	0.00989478	0.0175408	0.00677694	0.0111151	0.0237308	0.00547726	0.00571748	0.0105936	0.00162004	0.00830673	0.0139703
cfa-miR-106b	4.07821	1.34787	3.01743	3.2997	2.64827	2.64827	3.48771	3.48771	2.2577	8.39385	4.47549	3.22324	2.89058	2.57637	2.7224	6.59181	2.3856	3.62748
cfa-miR-302a	0.0091937	0.0321073	0.0491964	0.0246392	0.0143914	0.0143914	0.0107671	0.0107671	0.0216405	0.00677694	0.0111151	0.0237308	0.00831298	0.00714107	0.0146991	0.00309682	0.00830673	0.0237204
cfa-miR-1835	0.0607926	0.180091	0.058915	0.948484	0.265728	0.265728	0.0403918	0.0403918	0.12909	0.33962	0.0350249	0.0819289	0.0974701	0.0408719	0.0384657	0.00879643	0.216131	0.057994
cfa-miR-204	0.0193735	0.0321073	0.0491964	0.176464	0.0160145	0.0160145	0.0172784	0.0172784	0.0271023	0.00677694	0.0199921	0.0237308	0.0624179	0.0215052	0.0558978	0.0188694	0.0445209	0.0569304
cfa-miR-193a	1.37566	2.84825	0.686637	1.64168	2.20573	2.20573	2.42407	2.42407	1.76249	1.18038	1.48294	1.62049	1.55802	1.78225	2.11225	2.14017	1.97406	1.21946
cfa-miR-194	2.93404	0.643037	0.511788	1.04204	0.429208	0.429208	0.32642	0.32642	0.379024	0.506471	1.13931	0.847147	0.493476	0.370338	0.556738	0.210657	0.301834	0.367925
cfa-miR-181a	1.47866	1.09915	0.263533	1.06945	1.02984	1.02984	0.754528	0.754528	0.530569	0.770579	0.806127	0.692984	0.934665	1.02432	0.47244	1.13546	0.653537	0.955217
cfa-miR-454	0.0599101	0.0321073	0.0578984	0.0246392	0.0322532	0.0322532	0.127876	0.127876	0.0388558	0.0326609	0.0361967	0.0333739	0.0956443	0.241343	0.261795	0.554586	0.206875	0.144744
cfa-miR-378	1.55426	1.86639	0.713742	1.08737	1.40233	1.40233	0.643085	0.643085	0.611908	1.10621	0.925362	0.573083	0.895521	2.17084	0.970986	0.526853	0.967663	0.852152
cfa-miR-544	0.0091937	0.0321073	0.0491964	0.0246392	0.0143914	0.0143914	0.00989478	0.00989478	0.0175408	0.00677694	0.0111151	0.0237308	0.00547726	0.00571748	0.0105936	0.00162004	0.00830673	0.0139703
cfa-miR-203	0.13859	0.89723	0.28004	0.29011	2.65331	2.65331	0.120212	0.120212	0.158175	0.116423	0.484578	0.243102	0.143574	0.0481962	0.130876	0.119448	0.197259	0.407691
cfa-miR-432	0.0091937	0.0321073	0.0491964	0.0351125	0.0178493	0.0178493	0.0151671	0.0151671	0.0175408	0.0119039	0.0146649	0.0237308	0.00547726	0.00779581	0.0124777	0.00502736	0.0147937	0.0287927
cfa-miR-628	0.0102005	0.0321073	0.0491964	0.0246392	0.0176913	0.0176913	0.015011	0.015011	0.0189746	0.00677694	0.0112468	0.0246992	0.0172334	0.0278849	0.015173	0.0289865	0.0205391	0.0228864
cfa-miR-330	0.0348751	0.0321073	0.0491964	0.0558115	0.073889	0.073889	0.053899	0.053899	0.03132	0.0290922	0.0175598	0.0298455	0.0594391	0.0562597	0.0758125	0.205696	0.0740769	0.016514
cfa-miR-25	39.2489	20.7717	15.9583	19.5404	15.839	15.839	24.6659	24.6659	45.0855	192.785	45.6982	48.325	28.8102	33.4101	24.9669	19.557	18.0188	46.5505
cfa-miR-380	0.148382	0.17849	0.140784	0.230595	0.17446	0.17446	0.0365419	0.0365419	0.104434	0.056195	0.0940049	0.154179	0.0323214	0.0319511	0.0657121	0.0053708	0.0671767	0.0924642
cfa-miR-218	0.246499	0.247133	0.189866	0.648968	0.442121	0.442121	0.287545	0.287545	0.177664	0.123777	0.249344	0.236439	0.123519	0.183094	0.172087	0.586828	0.27836	0.161683
cfa-miR-676	0.108942	0.398328	0.721326	0.332551	0.272005	0.272005	0.226166	0.226166	0.853385	0.126223	0.1917	6.05603	0.134254	0.192579	0.587494	0.0569966	0.259648	0.435273
cfa-miR-590	0.0790683	0.0321073	0.0615337	0.0631758	0.0528853	0.0528853	0.112288	0.112288	0.060075	0.0394577	0.110111	0.0952669	0.11663	0.147223	0.232342	0.51101	0.214138	0.142502
cfa-let-7e	2.40057	1.36082	3.0206	0.933884	1.01429	1.01429	4.60579	4.60579	3.36773	2.54099	1.98269	3.02494	3.94499	9.60716	5.77286	18.9053	4.46996	2.78864
cfa-miR-124	1.64436	4.77716	0.644613	4.65311	4.19429	4.19429	0.687342	0.687342	2.04795	1.11703	0.907032	1.98354	0.56899	0.538287	0.950742	0.139836	1.42096	1.51153
cfa-miR-496	0.0091937	0.0321073	0.0491964	0.0246392	0.0143914	0.0143914	0.00989478	0.00989478	0.0175408	0.00677694	0.0111151	0.0237308	0.00547726	0.00647675	0.0154784	0.00162004	0.00935177	0.0139703
cfa-miR-10b	0.0255836	0.11528	0.0491964	0.0720869	0.116697	0.116697	0.0652119	0.0652119	0.0380944	0.0482781	0.0359037	0.0393221	0.0494589	0.0495693	0.0488049	0.0791192	0.0725638	0.0750061
cfa-miR-433	0.12144	0.149476	0.463734	0.565973	0.370677	0.370677	0.24367	0.24367	0.669327	0.131805	0.193848	0.702732	0.194346	0.160379	0.26258	0.0571964	0.584671	0.442807
cfa-miR-885	0.808899	0.421085	0.20274	0.311193	0.563424	0.563424	0.351087	0.351087	0.306464	0.329226	0.403419	0.347228	0.302425	0.186472	0.398014	0.0588236	0.205	0.225582
cfa-miR-211	0.043441	0.0321073	0.0724015	0.452148	0.0485241	0.0485241	0.0596392	0.0596392	0.0944872	0.0195185	0.0419144	0.0810041	0.0740765	0.0493635	0.097229	0.0208497	0.0687261	0.0927663
cfa-miR-384	0.0091937	0.0321073	0.0491964	0.0313802	0.0473109	0.0473109	0.0304534	0.0304534	0.0244757	0.0159249	0.0111151	0.0553879	0.0156418	0.0277441	0.020256	0.00234558	0.0257217	0.0275699
cfa-miR-33a	0.194386	0.108072	0.223759	0.159491	0.164654	0.164654	0.11102	0.11102	0.0738869	0.0798202	0.15274	0.135523	0.0985465	0.154417	0.301545	0.198092	0.184901	0.0650533
cfa-miR-342	3.06102	3.36124	1.0909	1.86634	1.32108	1.32108	1.04953	1.04953	1.80554	0.933054	0.826562	0.89421	1.50024	1.29416	1.03926	0.698794	1.11619	1.5964
cfa-miR-217	0.0091937	0.0321073	0.0491964	0.0246392	0.0143914	0.0143914	0.00989478	0.00989478	0.0175408	0.00677694	0.0111151	0.0237308	0.00547726	0.00571748	0.0105936	0.00162004	0.00830673	0.0139703
cfa-miR-1844	0.587261	1.44637	1.31053	1.73766	1.20212	1.20212	0.751262	0.751262	0.851555	0.532889	0.856356	0.750572	0.313352	0.282438	0.662466	0.128904	0.429934	2.09411
cfa-miR-409	0.0335815	0.0910593	0.0609654	0.0549859	0.0689071	0.0689071	0.027824	0.027824	0.0452078	0.0161703	0.0286581	0.0334717	0.030749	0.0275084	0.0227867	0.0171812	0.0674598	0.0495932
cfa-miR-224	0.0480178	0.254132	0.11367	0.216484	0.183677	0.183677	0.102315	0.102315	0.156172	0.0449927	0.100051	0.117628	0.118269	0.068892	0.0783169	0.0153437	0.110458	0.165502
cfa-miR-18b	0.0748872	0.0362585	0.143507	0.0707188	0.0754688	0.0754688	0.09913	0.09913	0.0532916	0.154338	0.0854215	0.0773109	0.0448864	0.0693765	0.0903345	0.132715	0.0800904	0.064339
cfa-miR-16	133.378	39.9937	90.9265	69.3723	44.3347	44.3347	75.6272	75.6272	153.258	404.848	167.279	167.679	123.165	137.421	114.144	109.407	89.4857	205.571
cfa-miR-543	0.568274	1.18979	0.451506	1.9074	1.04175	1.04175	0.508579	0.508579	0.853563	0.687628	0.536721	0.577106	0.351914	0.296992	0.496678	0.972138	0.778991	0.625084
cfa-miR-98	0.919429	0.215104	0.700154	0.403182	0.497029	0.497029	1.33892	1.33892	1.50923	1.00758	0.648466	0.760427	1.91952	1.75092	1.92313	4.04725	1.38548	1.7253
cfa-miR-216b	0.0177225	0.0474501	0.0491964	0.0515223	0.0573026	0.0573026	0.0445379	0.0445379	0.140747	0.0290688	0.0237772	0.0611723	0.0294901	0.0420517	0.0417095	0.00709734	0.075589	0.196571
cfa-miR-539	0.0091937	0.0321073	0.0491964	0.0246392	0.0240429	0.0240429	0.00989478	0.00989478	0.040728	0.0126668	0.0111151	0.0237308	0.0196643	0.00673918	0.032012	0.00324153	0.0213409	0.0460449
cfa-miR-193b	0.358554	1.14902	0.467701	1.32887	1.01042	1.01042	0.354199	0.354199	0.635337	0.536929	0.525461	0.307331	0.310997	0.27798	0.302534	0.0831962	0.318868	0.472639
cfa-miR-145	3.78434	11.9789	5.02934	11.0683	5.8465	5.8465	5.51361	5.51361	4.09914	3.1376	6.83278	4.67524	47.8307	7.75726	9.91207	4.41991	10.7045	15.2015
cfa-miR-103	1.52209	0.957086	1.08387	0.697561	0.870882	0.870882	1.79877	1.79877	1.62572	1.05624	1.1113	0.622603	2.63807	4.36267	3.35617	6.84117	2.89591	3.35035
cfa-miR-138a	0.312197	0.696103	0.736591	0.719573	0.515679	0.515679	0.350309	0.350309	0.571437	0.244517	0.271285	0.411123	0.256998	0.176627	0.537713	0.197095	0.237494	0.352782
cfa-miR-483	0.244063	0.282749	0.760686	0.203305	0.253409	0.253409	0.453846	0.453846	0.289272	0.952374	0.27533	0.328281	0.267786	0.310065	0.229773	0.604782	0.175337	0.206232
cfa-miR-450b	0.365329	0.0321073	0.279869	0.666633	0.342814	0.342814	0.178075	0.178075	0.316167	0.231432	0.407319	0.193948	0.128537	0.0361183	0.0550673	0.0281833	0.112005	0.125962
cfa-miR-139	0.139142	0.521981	0.314965	0.464653	0.355791	0.355791	0.121085	0.121085	0.296634	0.137618	0.319184	0.295149	0.136336	0.0667844	0.143766	0.0206908	0.177315	0.339751
cfa-miR-764	0.0148847	0.0335518	0.0491964	0.0334418	0.0156833	0.0156833	0.00989478	0.00989478	0.0178609	0.0111038	0.0111151	0.0237308	0.00762748	0.00571748	0.0108811	0.00278887	0.00830673	0.0139703
cfa-miR-150	38.2867	8.908	4.74138	12.2209	3.5372	3.5372	3.8765	3.8765	6.54553	3.99191	5.77971	5.54841	4.06234	11.1227	3.4453	1.24756	49.2817	9.25965
cfa-miR-302b	0.0091937	0.0321073	0.0753909	0.0465861	0.0143914	0.0143914	0.0175988	0.0175988	0.0175408	0.00677694	0.0111151	0.0237308	0.00547726	0.00810698	0.0105936	0.00162004	0.00922617	0.0139703
cfa-miR-30c	7.99848	3.11822	4.88657	3.87163	4.8465	4.8465	8.13949	8.13949	7.15926	15.3089	7.84485	6.32764	12.0394	8.26075	8.90048	24.005	9.98446	11.9328
cfa-miR-876	395.827	0.0321073	0.0491964	0.0439513	0.0143914	0.0143914	0.0110443	0.0110443	0.0175408	0.00677694	0.0111151	0.0237308	0.0153764	0.00576477	0.0105936	0.00162004	0.0204308	0.0139703
cfa-miR-95	0.0091937	0.0321073	0.0491964	0.0246392	0.0214056	0.0214056	0.00989478	0.00989478	0.0175408	0.00677694	0.0147756	0.0237308	0.0181269	0.0188523	0.0105936	0.00233125	0.016099	0.0194557
cfa-miR-568	0.0091937	0.0321073	0.0491964	0.0246392	0.0143914	0.0143914	0.00989478	0.00989478	0.0175408	0.00677694	0.0111151	0.0237308	0.00547726	0.00571748	0.0105936	0.00162004	0.00830673	0.0139703
cfa-miR-365	7.37312	4.63869	12.1688	4.35575	8.43112	8.43112	20.7648	20.7648	10.7224	7.18986	17.1646	6.73704	11.1324	11.6054	12.611	54.7759	12.8478	2.88507
cfa-miR-582	0.0297775	0.0321073	0.0491964	0.0326784	0.0417189	0.0417189	0.0113934	0.0113934	0.0175408	0.0145185	0.0241307	0.0237308	0.0063364	0.0080005	0.0105936	0.00286997	0.0113596	0.0139703
cfa-miR-545	0.0091937	0.0321073	0.0491964	0.0246392	0.0143914	0.0143914	0.00989478	0.00989478	0.0175408	0.00677694	0.0111151	0.0237308	0.00547726	0.00659876	0.0105936	0.0023815	0.00830673	0.0139703
cfa-miR-421	0.04819	0.0863143	0.133906	0.101887	0.195034	0.195034	0.198049	0.198049	0.361449	0.198843	0.129241	0.318725	0.187078	0.308984	0.26878	0.29291	0.28843	0.310966
cfa-miR-379	0.0091937	0.0321073	0.0491964	0.0288634	0.0212315	0.0212315	0.00989478	0.00989478	0.0182823	0.00677694	0.0111151	0.0280242	0.00605149	0.00571748	0.0107451	0.00162004	0.0157391	0.0185547
cfa-miR-1306	2.35093	1.94577	1.9524	0.966081	1.38815	1.38815	2.38737	2.38737	2.33209	10.2306	3.10496	1.74807	1.48354	1.76833	1.34393	2.78584	1.14444	1.37466
cfa-miR-127	0.0246734	0.270357	0.0491964	0.0581014	0.0249814	0.0249814	0.0128272	0.0128272	0.0316763	0.00919141	0.0111151	0.025614	0.0168631	0.011117	0.0105936	0.00430916	0.0273142	0.0205495
cfa-miR-190a	0.0230532	0.0321073	0.0491964	0.0246392	0.0143914	0.0143914	0.0241485	0.0241485	0.0175408	0.00677694	0.0111151	0.0237308	0.016515	0.053494	0.0558186	0.130999	0.0192886	0.0139703
cfa-miR-27a	23.1018	28.4466	28.4493	22.6211	25.9378	25.9378	37.3533	37.3533	17.7165	18.1111	28.9039	18.4746	35.2771	28.4691	24.8829	82.3881	23.5673	14.2518
cfa-miR-28	1.13153	0.246811	0.660894	0.229806	0.569959	0.569959	2.66379	2.66379	0.626919	0.29048	0.673222	0.510938	1.61141	2.39058	1.47653	5.78789	1.60277	0.247734
cfa-miR-490	0.0183222	0.0458513	0.0491964	0.0614386	0.0321165	0.0321165	0.00989478	0.00989478	0.0241891	0.0148157	0.0251477	0.0237308	0.00779145	0.00919641	0.0114625	0.00435062	0.00830673	0.0205346
cfa-let-7b	8.87248	4.99064	13.8468	3.07656	4.98274	4.98274	11.0002	11.0002	20.0352	22.2085	9.48531	16.5309	17.5588	27.0895	17.3328	37.1707	18.8032	34.5965
cfa-miR-128	4.29176	1.19536	1.3159	1.72909	1.70647	1.70647	3.2861	3.2861	3.00065	8.08049	4.24739	2.72595	3.03203	3.48932	2.53081	5.9238	2.22007	3.33432
cfa-miR-137	0.0091937	0.0321073	0.0491964	0.0246392	0.0143914	0.0143914	0.0118895	0.0118895	0.0175408	0.00677694	0.0111151	0.0237308	0.00752836	0.00571748	0.0105936	0.00382524	0.00943272	0.0139703
cfa-miR-20b	0.255089	0.133469	0.221698	0.17993	0.129611	0.129611	0.388379	0.388379	0.302777	0.556559	0.220047	0.220781	0.234081	0.30058	0.248559	0.801111	0.230916	0.255757
cfa-miR-31	0.133021	0.157437	0.0548762	0.263192	0.0827968	0.0827968	0.039793	0.039793	0.0459637	0.0317139	0.0536296	0.0711169	0.0413204	0.176393	0.0783067	0.018979	0.0425077	0.220912
cfa-miR-138b	0.333809	1.01998	1.17469	0.743188	0.510378	0.510378	0.248101	0.248101	1.09472	0.34589	0.330254	1.08772	0.243471	0.346633	0.693088	0.167649	0.560616	0.669708
cfa-miR-335	0.0091937	0.0321073	0.0803746	0.0894153	0.0247172	0.0247172	0.0385931	0.0385931	0.128165	0.00677694	0.0230465	0.0680476	0.0167736	0.0286226	0.0291957	0.00955962	0.0591503	0.0925877
cfa-miR-376a	0.0249973	0.0667508	0.0491964	0.038334	0.0180752	0.0180752	0.0126188	0.0126188	0.0303472	0.0107086	0.0111151	0.0714048	0.00570774	0.00571748	0.0105936	0.00163548	0.0105467	0.0270075
cfa-miR-29a	5.88483	4.28143	5.42399	7.09332	4.2267	4.2267	3.95281	3.95281	3.57871	10.0745	8.60305	6.29516	5.75112	4.4328	4.46719	4.05676	6.03378	6.43604
cfa-miR-133b	0.0193743	0.0384931	0.0491964	0.0249795	0.0259838	0.0259838	0.00989478	0.00989478	0.0188079	0.0164286	0.0139213	0.0294659	0.0258155	0.0243142	0.0446234	0.0200026	0.0348511	0.0397224
cfa-miR-144	0.618453	0.249641	0.893386	0.346858	0.272407	0.272407	0.0864488	0.0864488	0.206881	0.689727	0.491579	0.541901	0.716739	1.47432	1.33067	0.0889833	1.18283	2.60186
cfa-miR-759	0.0091937	0.0321073	0.0491964	0.0246392	0.0151069	0.0151069	0.00989478	0.00989478	0.0175408	0.00677694	0.0111151	0.0237308	0.00547726	0.00571748	0.0105936	0.00162004	0.00830673	0.0139703
cfa-miR-500	0.125806	0.265851	0.0671074	0.0748554	0.136888	0.136888	0.290192	0.290192	0.136786	0.0777016	0.176579	0.10608	0.167423	0.260345	0.178414	0.548946	0.138771	0.0608061
cfa-miR-181c	1.82421	0.637139	0.986375	0.601834	0.721821	0.721821	2.78244	2.78244	0.801965	0.597245	1.29424	0.708913	1.68349	2.49416	2.22915	6.94364	1.49594	0.702323
cfa-miR-424	0.362188	0.598336	0.135626	1.30885	0.697062	0.697062	0.182793	0.182793	0.406781	0.254241	0.332993	0.414401	0.200247	0.128743	0.184557	0.0365871	0.437145	0.382119
cfa-miR-223	173.63	44.8893	93.3121	162.266	106.162	106.162	138.871	138.871	85.8023	59.7191	224.237	81.3336	55.8002	80.8175	56.3761	125.935	46.4237	0.163759
cfa-miR-300	0.0091937	0.0321073	0.0491964	0.0246392	0.0143914	0.0143914	0.00989478	0.00989478	0.0175408	0.00677694	0.0111151	0.0237308	0.00547726	0.00571748	0.0105936	0.00162004	0.00830673	0.0139703
cfa-miR-329b	0.0278511	0.0412544	0.0491964	0.0427086	0.0460375	0.0460375	0.0183142	0.0183142	0.0358489	0.015915	0.019964	0.0237308	0.0129054	0.0090916	0.0357751	0.00838583	0.0245551	0.0344955
cfa-miR-222	2.43076	2.29662	4.14214	1.56375	1.92359	1.92359	7.1949	7.1949	2.53602	1.08289	3.50031	1.96945	6.2483	6.67641	6.15958	15.4905	3.45466	1.16847
cfa-miR-34a	0.121704	0.674189	0.394124	0.212758	0.608489	0.608489	0.34001	0.34001	0.20439	0.292682	0.406637	0.250543	0.617314	0.364523	0.364102	0.68175	0.333232	0.364013
cfa-miR-514	0.0091937	0.0321073	0.0491964	0.0246392	0.0143914	0.0143914	0.00989478	0.00989478	0.0175408	0.00677694	0.0111151	0.0237308	0.00547726	0.00571748	0.0105936	0.00162004	0.00830673	0.0139703
cfa-miR-301a	0.675328	0.325843	0.659715	0.469031	0.667643	0.667643	1.37817	1.37817	0.524214	1.8471	0.848438	0.720665	1.09587	0.878861	1.22176	2.95522	0.725111	1.09396
cfa-miR-1	0.18109	0.467751	0.68993	1.47762	0.102115	0.102115	0.0599997	0.0599997	0.115729	0.170654	0.432654	0.18756	0.385731	0.689081	0.248398	0.0931395	0.350159	0.885311
cfa-miR-1307	0.333146	0.483881	0.283412	0.747839	0.475515	0.475515	0.263286	0.263286	0.428213	0.424846	0.412316	0.309484	0.223317	0.128032	0.19465	0.131093	0.356485	0.367901
cfa-miR-152	0.0944604	0.263016	0.181399	0.104362	0.172938	0.172938	0.0867033	0.0867033	0.287184	0.121997	0.197712	0.184874	0.269293	0.0974877	0.122283	0.0552617	0.1459	0.352966
cfa-miR-325	0.0091937	0.0321073	0.0491964	0.0254532	0.0143914	0.0143914	0.0121348	0.0121348	0.0180829	0.00677694	0.0111151	0.0237794	0.00926581	0.00956377	0.0230575	0.00212914	0.0150045	0.0139703
cfa-miR-122	2.6484	1.53103	3.7442	1.07974	5.42844	5.42844	2.1861	2.1861	0.884352	5.57267	4.29017	1.25073	4.35382	2.14532	6.48025	0.384377	2.88851	4.44751
cfa-miR-197	4.68988	3.74158	4.12473	2.51552	3.11157	3.11157	4.09896	4.09896	4.99805	12.0176	6.45857	3.73173	2.90175	4.05444	2.55554	5.67713	2.51679	3.33227
cfa-miR-30a	5.36749	3.1377	5.34779	3.79529	4.14921	4.14921	6.61925	6.61925	4.72503	7.05939	6.76151	4.38275	8.24401	6.81809	7.62831	13.7825	5.42143	6.08676
cfa-miR-551b	1.53585	0.262056	2.22699	0.226658	1.14473	1.14473	3.50047	3.50047	0.686807	0.57688	1.19975	0.769749	1.05026	1.77559	2.20473	9.05198	4.20474	0.237945
cfa-miR-299	0.00971831	0.0773245	0.0491964	0.0647069	0.0389295	0.0389295	0.00989478	0.00989478	0.0888669	0.00967967	0.0143283	0.0424206	0.0116979	0.0162419	0.0105936	0.00467223	0.0276166	0.0244139
cfa-miR-1841	0.235273	0.387722	0.0742352	0.435385	0.285225	0.285225	0.105753	0.105753	0.150236	0.115209	0.115019	0.248359	0.128447	0.0512236	0.115733	0.0528466	0.163851	0.120601
cfa-miR-542	0.168945	0.0548132	0.158611	0.276599	0.346884	0.346884	0.061065	0.061065	0.146973	0.0881357	0.153922	0.135654	0.0803754	0.0563994	0.073595	0.021986	0.0915153	0.117261
cfa-let-7f	2.70148	0.753451	2.76898	0.611627	1.15277	1.15277	4.10215	4.10215	2.53435	1.67793	1.9014	1.57688	2.9581	6.91564	4.32398	15.937	3.86132	1.42783
cfa-miR-105b	0.0091937	0.0321073	0.0491964	0.0246392	0.0143914	0.0143914	0.0129236	0.0129236	0.0175408	0.00677694	0.0111151	0.0237308	0.00547726	0.00571748	0.0105936	0.00245413	0.00830673	0.0184393
cfa-miR-1838	0.261716	0.615593	0.153394	0.510602	0.379795	0.379795	0.169712	0.169712	0.171251	0.227883	0.199295	0.210244	0.129645	0.172308	0.20002	0.0746317	0.139894	0.174113
cfa-miR-503	0.100286	0.0745994	0.2507	0.194157	0.152994	0.152994	0.101178	0.101178	0.15864	0.0935155	0.146606	0.0650367	0.0707045	0.0462059	0.0691749	0.0154959	0.045492	0.0504996
cfa-miR-363	0.226062	0.205458	0.397401	0.268142	0.107287	0.107287	0.385909	0.385909	0.109868	0.107055	0.142368	0.160819	0.162384	0.182154	0.151972	0.384557	0.200992	0.100414
cfa-miR-191	56.681	26.2781	29.6298	23.6657	32.7356	32.7356	72.7612	72.7612	44.4039	121.471	47.094	34.5635	38.1087	45.2368	33.7356	82.0262	33.7523	48.1479
cfa-miR-410	0.170768	0.938861	0.0491964	0.869474	0.568968	0.568968	0.0995068	0.0995068	0.180686	0.131291	0.123596	0.231976	0.12302	0.0619394	0.100898	0.0124763	0.212008	0.197237
cfa-miR-664	0.0091937	0.0321073	0.0491964	0.0246392	0.0172364	0.0172364	0.0104449	0.0104449	0.0230856	0.0108492	0.0111151	0.0237308	0.00980552	0.010942	0.0183016	0.00401541	0.00987105	0.0198133
cfa-miR-497	0.230112	0.736857	0.288598	0.265349	0.367885	0.367885	0.187539	0.187539	0.149975	0.137528	0.189784	0.219071	0.80339	0.207895	0.204502	0.380917	0.353805	0.304707
cfa-miR-133a	0.0423409	0.0871202	0.107043	0.0709303	0.0941178	0.0941178	0.0233042	0.0233042	0.0254612	0.0464572	0.0336775	0.0494059	0.056066	0.0998674	0.0509029	0.0237526	0.0842579	0.198669
cfa-miR-495	0.0602859	0.152792	0.145363	0.174522	0.189287	0.189287	0.0548102	0.0548102	0.0645735	0.0315716	0.0859735	0.116021	0.0297603	0.0576332	0.397247	0.0154128	0.076282	0.0861409
cfa-miR-487b	0.0196189	0.0598158	0.0491964	0.0656278	0.0359979	0.0359979	0.0214299	0.0214299	0.0321583	0.0297083	0.035111	0.0338165	0.0126255	0.0133204	0.0129624	0.00569379	0.0227775	0.0204171
cfa-miR-17	0.12085	0.0668352	0.167157	0.077508	0.0975836	0.0975836	0.119312	0.119312	0.126425	0.247157	0.174938	0.146264	0.176994	0.102711	0.138796	0.369835	0.123788	0.179462
cfa-miR-205	1.07019	6.04888	1.15919	1.5048	2.24956	2.24956	0.657594	0.657594	0.748648	0.450207	1.64469	2.19433	0.499783	0.210524	0.377807	0.1406	0.542659	1.90105
cfa-miR-589	0.0091937	0.0321073	0.0491964	0.0283426	0.0316247	0.0316247	0.00989478	0.00989478	0.0346366	0.0085362	0.0166198	0.037984	0.0138782	0.0110312	0.0105936	0.00448222	0.0416436	0.0278765
cfa-miR-599	0.0154365	0.0321073	0.0491964	0.0246392	0.0196178	0.0196178	0.0116482	0.0116482	0.0175408	0.00677694	0.0131361	0.0237308	0.00860937	0.00863197	0.0206348	0.0162864	0.00830673	0.0139703
cfa-miR-212	0.0091937	0.0321073	0.0491964	0.0246392	0.0143914	0.0143914	0.00989478	0.00989478	0.0175408	0.00677694	0.0111151	0.0237308	0.00772681	0.00571748	0.0105936	0.00199187	0.0105463	0.0202821
cfa-miR-487a	0.02109	0.0378416	0.0491964	0.0396531	0.029611	0.029611	0.0119805	0.0119805	0.0290916	0.00991033	0.0144738	0.0237308	0.0204147	0.0157049	0.0218074	0.0120755	0.0284799	0.0513244
cfa-miR-425	1.82303	0.844069	2.53604	1.31002	1.59482	1.59482	4.02492	4.02492	2.39242	4.39102	130.595	0.285724	2.91985	3.52023	1.68238	3.46625	2.47477	2.09225
cfa-miR-505	0.210191	0.16808	0.23293	0.163543	0.0970338	0.0970338	0.176891	0.176891	0.387527	0.555622	0.259233	0.230613	0.230642	0.283948	0.266613	0.273549	0.190631	0.281608
cfa-miR-125b	2.00072	2.33186	2.56082	1.3889	2.42513	2.42513	2.03917	2.03917	1.54998	1.24216	2.96892	2.22999	4.24233	2.26258	2.9812	3.71053	3.12481	2.13022
cfa-miR-30e	0.311353	0.125807	0.336798	0.215271	0.203579	0.203579	0.422657	0.422657	0.36773	0.33631	0.358456	0.273796	0.490661	0.490327	0.351087	0.971383	0.408475	0.350671
cfa-miR-219-5p	0.152448	0.0592474	0.120117	0.0806745	0.0927331	0.0927331	0.126217	0.126217	0.0993185	0.100415	0.145866	0.0590213	0.1434	0.107569	0.12313	0.283972	0.0786348	0.0813386
cfa-miR-148a	5.32215	2.85548	2.80954	3.56726	2.74496	2.74496	3.07173	3.07173	2.73176	7.25687	3.94099	3.47353	2.40571	3.83015	2.10338	2.53758	1.891	5.3829
cfa-miR-660	1.16247	0.56622	1.9844	0.779139	1.89793	1.89793	3.0934	3.0934	0.774345	0.836528	1.63411	0.747578	1.08943	1.28996	1.46681	5.41069	1.2484	0.533045
cfa-miR-182	0.0103285	0.0394057	0.0491964	0.0246392	0.0208157	0.0208157	0.0397433	0.0397433	0.0415161	0.0144269	0.0156924	0.0237308	0.0362742	0.0360064	0.0386974	0.0423354	0.0424334	0.0429572
cfa-let-7c	1.29193	0.722104	2.58453	0.393363	0.660736	0.660736	2.35377	2.35377	2.58773	2.08526	1.12157	1.75747	6.76898	3.61588	2.98099	5.48334	3.00881	3.58285
cfa-miR-200c	0.0835294	0.0945063	0.114425	0.134905	0.245013	0.245013	0.14537	0.14537	0.300026	0.0668981	0.223917	0.111158	0.134699	0.278901	0.248805	0.226176	0.140124	0.227485
cfa-miR-136	0.0091937	0.0321073	0.0491964	0.0246392	0.0143914	0.0143914	0.00989478	0.00989478	0.0175408	0.00677694	0.0111151	0.0237308	0.00583261	0.00571748	0.0105936	0.00177299	0.0100122	0.0139703
cfa-miR-326	1.89976	0.876441	0.972571	0.845336	1.05991	1.05991	1.83542	1.83542	0.897973	0.724611	1.05607	0.673125	1.4301	1.19983	1.22679	4.06217	0.959927	0.41295
cfa-miR-382	0.0116015	0.106993	0.0549495	0.0549858	0.0391043	0.0391043	0.0142821	0.0142821	0.0504139	0.0190142	0.0308286	0.0616624	0.00976774	0.00932391	0.0281408	0.00466932	0.021815	0.038226
cfa-miR-215	0.0405001	0.0321073	0.0670648	0.0424194	0.0261677	0.0261677	0.0326348	0.0326348	0.0964555	0.0116592	0.15892	0.0649387	0.0346412	0.0786774	0.129797	0.0340242	0.033145	0.0361004
cfa-miR-221	22.2025	7.28352	8.51776	4.52284	8.13881	8.13881	25.3156	25.3156	9.63856	5.18735	12.729	4.2105	9.90525	12.0295	12.0098	43.3058	9.61815	2.52053
cfa-miR-190b	0.0523331	0.0588613	0.0612228	0.0246392	0.0504966	0.0504966	0.0503553	0.0503553	0.0948638	0.134617	0.0591295	0.0727804	0.088582	0.129192	0.0599389	0.0905945	0.0799787	0.178734
cfa-miR-148b	1.4954	0.722037	0.725835	0.957979	1.00777	1.00777	1.83273	1.83273	1.07627	3.69723	1.64776	1.22953	1.47982	1.48122	1.50269	3.75777	1.28528	1.8464
cfa-miR-101	4.74189	1.10963	3.69414	2.87887	2.8655	2.8655	2.90161	2.90161	2.34681	5.65003	3.27494	2.59969	3.12232	2.27204	3.07374	4.40475	2.44513	3.17041
cfa-miR-350	2.80203	0.526273	3.48273	0.685377	1.6456	1.6456	5.87214	5.87214	1.94564	3.64604	2.62263	1.68362	3.11971	3.22277	3.22104	11.8263	2.40496	1.5746
cfa-let-7j	0.0634159	0.210603	0.187043	0.267619	0.143363	0.143363	0.10386	0.10386	0.176439	0.0701338	0.0799652	0.221211	0.0827865	0.111095	0.0719825	0.022596	0.0908703	0.130071
cfa-miR-15b	13.9395	4.09638	7.95413	6.53617	6.14633	6.14633	11.5084	11.5084	11.4956	38.747	18.4932	13.9104	11.5006	17.4548	10.5511	14.538	10.7384	15.3321
cfa-miR-155	0.0911222	0.270701	0.0982216	0.527919	0.200961	0.200961	0.101159	0.101159	0.167271	0.0919311	0.0855365	0.164682	0.154284	0.215757	0.194629	0.127887	0.265162	0.282487
cfa-miR-199	0.626325	2.33406	0.982887	1.36313	1.27773	1.27773	0.734686	0.734686	0.261019	0.498294	1.24172	0.956979	1.57425	0.621297	0.495921	0.703403	0.793562	0.986037
cfa-miR-423a	5.92133	5.87211	4.55184	3.67503	5.08628	5.08628	6.48047	6.48047	6.04843	12.2214	4.16814	6.48915	3.55911	5.04282	3.13426	9.24905	3.44642	5.84327
cfa-miR-450a	1.00161	0.212697	0.976549	0.996098	0.793414	0.793414	0.249153	0.249153	0.774116	0.4819	1.02611	12.0697	0.306325	0.168489	0.155598	0.0680416	0.221505	0.195575
cfa-miR-301b	0.397013	0.184377	0.558108	0.377259	0.418416	0.418416	0.788614	0.788614	0.468441	1.28911	0.556735	0.576515	0.702371	0.595037	0.695407	2.3774	0.505941	0.745124
cfa-miR-578	0.0091937	0.0321073	0.0491964	0.0246392	0.0143914	0.0143914	0.00989478	0.00989478	0.0175408	0.00677694	0.0111151	0.0237308	0.00547726	0.00571748	0.0105936	0.00162004	0.00830673	0.0139703
cfa-miR-23b	2.12434	4.8883	2.60496	2.30382	2.36279	2.36279	2.70366	2.70366	1.99999	1.40557	1.80667	2.06062	3.12999	3.71386	1.75363	3.76709	2.2698	1.77453
cfa-miR-652	1.40407	0.954141	0.905233	1.67929	1.08393	1.08393	1.179	1.179	2.0224	3.01098	1.53857	1.52076	1.91332	2.40308	1.6355	3.40509	1.58348	3.44057
cfa-miR-19b	28.3076	8.94939	26.0586	15.6516	13.3803	13.3803	30.4823	30.4823	22.4928	74.9295	33.7889	28.7403	26.5807	24.4815	22.9913	38.6478	17.4233	35.924
cfa-miR-574	0.315805	1.82532	0.491537	0.696694	0.601426	0.601426	0.395568	0.395568	0.579832	0.326085	0.620181	0.600061	1.03606	0.36869	0.263015	0.226143	0.463014	0.623752
cfa-let-7g	11.8105	4.43422	9.49379	4.08017	5.58519	5.58519	12.5142	12.5142	13.1221	16.4787	10.2307	7.77085	12.3319	16.2434	13.1686	35.9986	13.9648	16.6329
cfa-miR-592	0.0091937	0.0321073	0.0491964	0.0246392	0.0784589	0.0784589	0.00994006	0.00994006	0.058776	0.0379197	0.0135651	0.0314861	0.0170936	0.0142291	0.0189977	0.00678306	0.0173662	0.0486213
cfa-miR-302d	0.0715376	0.0778737	0.0515592	0.170092	0.101397	0.101397	0.0282585	0.0282585	0.0467323	0.0297829	0.0252828	0.0456816	0.0228703	0.02344	0.0265311	0.00700269	0.0508768	0.0533062
cfa-miR-489	1.79546	5.84853	2.90908	6.85561	3.93807	3.93807	1.17439	1.17439	3.07587	1.61881	1.46969	3.15784	1.00473	0.822331	1.43578	0.250872	1.73018	2.33526
cfa-miR-153	0.0091937	0.0321073	0.0491964	0.0301251	0.0272019	0.0272019	0.0224533	0.0224533	0.0314867	0.0121209	0.0111151	0.0444624	0.00547726	0.0146529	0.01149	0.0150285	0.0195901	0.045963
cfa-miR-488	0.025788	0.0321073	0.0491964	0.0382723	0.0143914	0.0143914	0.00989478	0.00989478	0.0294028	0.00677694	0.0111151	0.0237308	0.00572733	0.00571748	0.0105936	0.00383695	0.0258114	0.0245842
cfa-miR-22	4.55941	4.45418	6.9369	4.17828	5.1173	5.1173	8.5451	8.5451	2.71838	7.29493	6.92296	3.59176	7.938	5.78406	5.20228	12.501	4.1515	4.32534
cfa-miR-7	0.453534	0.191961	0.567468	0.123898	0.139795	0.139795	0.141881	0.141881	0.985536	2.07189	0.475282	0.883552	0.967347	1.35821	0.654761	0.235733	0.53514	2.58055
cfa-miR-135a-3p	0.133508	0.309348	0.142294	0.395226	0.37458	0.37458	0.185512	0.185512	0.650612	0.0908411	0.0952278	0.376955	0.225921	0.187431	0.250239	0.0770501	0.340619	0.666122
cfa-miR-376b	0.0184783	0.0321073	0.0491964	0.067409	0.0334105	0.0334105	0.0242938	0.0242938	0.093499	0.00694231	0.0191926	0.06062	0.0148178	0.0211467	0.0455018	0.00859743	0.0440295	0.0639405
cfa-miR-671	0.0869216	0.053311	0.134967	0.060037	0.0414868	0.0414868	0.05825	0.05825	0.0736348	0.0812271	0.0796889	0.0560466	0.0509395	0.0385103	0.0495493	0.10017	0.0729988	0.0471206
cfa-miR-192	10.1562	4.15414	2.95797	3.35061	2.21029	2.21029	2.49107	2.49107	2.74772	2.33883	4.39734	2.44348	1.95005	1.84402	2.59794	0.723176	0.937835	2.16251
cfa-miR-532	0.862628	0.395872	0.420175	0.388524	0.535494	0.535494	1.10227	1.10227	0.443079	0.344403	0.533633	0.253798	0.524308	0.623404	0.462312	2.00606	0.433823	0.242432
cfa-miR-377	0.0194196	0.0641617	0.0491964	0.134131	0.0526542	0.0526542	0.0228651	0.0228651	0.083775	0.0132006	0.0335879	0.0596479	0.0149017	0.021012	0.031852	0.006812	0.0449749	0.0595635
cfa-miR-135b	0.105557	0.0321073	0.0625479	0.0246392	0.0193732	0.0193732	0.104703	0.104703	0.0289341	0.00859527	0.0111151	0.0545354	0.0824338	0.0873236	0.173835	0.291139	0.138592	0.0154913
cfa-miR-126	12.281	6.45142	12.5184	4.71402	9.98133	9.98133	24.3919	24.3919	8.61726	6.40585	13.0408	8.36521	27.5103	10.6402	12.93	51.2155	17.0184	10.3919
cfa-miR-653	0.0091937	0.0321073	0.0491964	0.0246392	0.0143914	0.0143914	0.00989478	0.00989478	0.0175408	0.00677694	0.0111151	0.0237308	0.00547726	0.00571748	0.0105936	0.00162004	0.00830673	0.0139703
cfa-miR-374a	1.0017	0.12406	0.956058	0.225452	0.413646	0.413646	0.895986	0.895986	0.283486	0.669723	0.856215	0.613498	1.3833	0.998772	1.60854	5.05362	1.38096	0.556143
cfa-miR-210	0.651479	0.822946	0.922278	2.126	2.3176	2.3176	1.18321	1.18321	2.7755	0.82942	0.720666	1.73586	1.96559	1.03927	1.17045	2.20387	1.17605	1.74159
cfa-miR-1842	0.435321	0.775959	0.292586	0.894354	0.460664	0.460664	0.399408	0.399408	0.497179	0.4314	0.540812	0.432676	0.332725	0.291187	0.415481	0.628624	0.38401	0.542358
cfa-miR-143	0.257954	0.55843	0.626185	0.895116	0.646541	0.646541	0.39254	0.39254	0.443531	0.462584	0.379502	0.906086	3.91634	0.580046	0.984174	0.318806	1.37034	1.36486
cfa-miR-329a	0.0091937	0.0321073	0.0491964	0.0246392	0.0143914	0.0143914	0.00989478	0.00989478	0.0175408	0.00709126	0.0111151	0.0237308	0.00547726	0.00571748	0.0105936	0.00162004	0.00830673	0.0139703
cfa-miR-371	1.28633	4.14702	1.74038	8.28325	3.66118	3.66118	1.72001	1.72001	2.22152	1.46554	1.73491	2.61717	0.895468	4.4965	1.09192	0.267958	1.57359	2.17571
cfa-miR-125a	0.906585	1.59108	1.74673	1.17359	1.08497	1.08497	0.92246	0.92246	0.739968	0.48629	1.15	0.79862	2.9624	1.2908	0.892179	0.852493	1.6671	1.41948
cfa-miR-184	0.0091937	0.0321073	0.0491964	0.0246392	0.0143914	0.0143914	0.0601988	0.0601988	0.0535808	0.013678	0.0311622	0.0918514	0.0240666	0.161847	0.0161548	0.0740873	0.0577777	0.0215097
cfa-miR-181d	0.302355	0.31174	0.390017	0.395196	0.378974	0.378974	0.756127	0.756127	0.481311	0.275182	0.266421	0.230083	0.507479	0.753737	0.571848	1.89904	0.555935	0.251296
cfa-miR-324	0.137327	0.211156	0.0657332	0.271042	0.17364	0.17364	0.145482	0.145482	0.109832	0.16688	0.15397	0.193112	0.138351	0.160421	0.209235	0.534724	0.27151	0.158165
cfa-miR-140	3.96873	2.79134	1.78072	3.3639	2.16635	2.16635	3.13148	3.13148	2.19373	5.13251	3.26403	2.39136	2.19876	2.03069	1.70055	3.41891	1.07287	1.55745
cfa-miR-1836	0.0091937	0.0321073	0.0491964	0.0246392	0.0143914	0.0143914	0.00989478	0.00989478	0.0175408	0.00677694	0.0291595	0.0237308	0.0228523	0.00646059	0.0250094	0.0047344	0.0242425	0.033392
cfa-miR-32	0.347491	0.171101	0.304745	0.286986	0.304062	0.304062	0.391261	0.391261	0.381711	1.62379	0.479911	0.956792	0.655375	0.436282	0.572552	0.423786	0.44787	1.03158
cfa-miR-499	0.648675	0.0701584	0.366227	0.166427	0.332052	0.332052	0.483542	0.483542	0.393702	0.394836	0.307767	0.298358	0.486302	0.493285	0.622963	5.45754	0.881907	0.166177
cfa-miR-455	0.0091937	0.0598378	0.0491964	0.0511092	0.0431387	0.0431387	0.0130242	0.0130242	0.0306262	0.0191935	0.0322686	0.0256667	0.0277087	0.00827449	0.0252812	0.0132891	0.0218254	0.0244995
cfa-miR-15a	6.86301	2.94254	6.0574	6.73834	5.02963	5.02963	4.84055	4.84055	7.17034	21.1145	8.50853	10.2935	6.65937	6.82435	5.66727	8.33619	5.38175	8.76224
cfa-miR-106a	16.2685	5.69257	11.0776	7.06958	8.12917	8.12917	16.1654	16.1654	12.5818	35.6854	16.0572	14.635	15.1726	14.2748	14.4695	33.2118	10.2789	12.1495
cfa-miR-1839	0.161701	0.10712	0.111445	0.0287696	0.181069	0.181069	0.213028	0.213028	0.130443	0.288048	0.121494	0.139874	0.0991382	0.116703	0.122619	0.480129	0.0987821	0.140259
cfa-miR-132	0.206995	0.68599	0.156158	3.92874	0.510276	0.510276	0.191451	0.191451	0.211884	0.240175	0.139055	0.243241	0.157183	2.63371	0.152866	0.0270393	0.179023	0.187852
cfa-miR-345	0.276211	0.835455	0.129924	1.08564	0.609699	0.609699	0.0959293	0.0959293	0.232827	0.130739	0.110121	0.342624	0.0957421	0.114566	0.142783	0.0267014	0.160933	0.260607
cfa-miR-361	0.259356	0.225336	0.295586	0.148822	0.298483	0.298483	0.889785	0.889785	0.427176	0.521885	0.295575	0.228255	0.318139	0.455381	0.343681	0.962836	0.382935	0.214901
cfa-miR-21	12.9166	16.0274	15.0706	13.3996	14.0795	14.0795	22.5871	22.5871	11.6568	12.0297	16.3129	12.5594	19.8069	24.7826	23.5392	45.863	20.4956	16.5749
cfa-miR-34b	0.0091937	0.0321073	0.0491964	0.0246392	0.0143914	0.0143914	0.00989478	0.00989478	0.0175408	0.00677694	0.0111151	0.0237308	0.00547726	0.00571748	0.0105936	0.00162004	0.00830673	0.0139703
cfa-miR-186	5.90511	2.11733	5.85368	2.52127	2.34586	2.34586	5.74541	5.74541	6.36306	9.23742	5.95648	4.16279	6.22403	7.83555	6.07768	16.9468	4.79308	6.39001
cfa-miR-502	0.809902	0.870694	0.890955	0.418523	0.652819	0.652819	1.67446	1.67446	0.814578	0.563397	1.17062	0.499083	0.779018	1.4069	1.00232	4.06408	1.03081	0.264498
cfa-miR-92b	0.532326	0.411919	0.416634	0.452491	0.396502	0.396502	0.506817	0.506817	0.632518	1.46675	0.436687	0.422886	0.423939	0.516026	0.896347	0.61929	0.320499	0.587528
cfa-miR-29b	2.06693	0.758028	1.09606	1.84212	1.14687	1.14687	0.758898	0.758898	0.505144	3.10407	0.978691	1.4745	1.43596	0.906867	0.804849	0.817997	1.3141	1.27847
cfa-miR-802	0.164878	0.0570518	0.0586957	0.0538879	0.0319419	0.0319419	0.0468465	0.0468465	0.040418	0.0390867	0.0644314	0.0687689	0.0327049	0.0380045	0.103182	0.0120133	0.0103765	0.0470518
cfa-miR-29c	10.5986	7.10028	7.8433	11.1863	7.02065	7.02065	5.28231	5.28231	5.90498	15.2491	12.1401	7.65618	8.53401	7.08372	5.87709	5.72669	6.83724	9.44566
cfa-miR-24	64.9305	70.8143	39.872	30.0547	32.8146	32.8146	63.0295	63.0295	39.1222	23.0144	43.8722	36.1714	63.7146	44.0517	30.6494	115.603	40.6633	21.0759
cfa-miR-130a	0.486563	1.7655	0.666112	0.698079	0.792679	0.792679	0.837902	0.837902	0.500345	0.335115	0.452453	0.474686	2.54734	0.937831	0.603346	1.97407	0.846063	0.859695
cfa-miR-146b	0.0191779	0.342379	0.0491964	0.17478	0.0560359	0.0560359	0.0556216	0.0556216	0.05535	0.0509174	0.0578412	0.089634	0.0622228	0.412575	0.0358998	0.0404225	0.0445037	0.0728744
cfa-miR-376c	0.0091937	0.0321073	0.0491964	0.0246392	0.0143914	0.0143914	0.00989478	0.00989478	0.0175408	0.00677694	0.0111151	0.0237308	0.00547726	0.00571748	0.0105936	0.00162004	0.00830673	0.0139703
cfa-miR-23a	53.1513	79.2939	64.645	40.2949	45.4652	45.4652	100.938	100.938	59.1625	40.1846	66.5064	51.9935	83.9215	78.9148	63.6566	222.242	58.0528	28.6118
cfa-miR-493	0.0768797	0.308594	0.0491964	0.326464	0.244008	0.244008	0.0722249	0.0722249	0.214895	0.0824482	0.0728507	0.160723	0.0696655	0.0618462	0.0501301	0.0115845	0.106887	0.135736
cfa-miR-188	0.213555	0.358341	0.361479	0.253348	0.29988	0.29988	0.400258	0.400258	0.120157	0.175667	0.229798	0.202483	0.238705	0.502461	0.310804	1.14392	0.300496	0.0875491
cfa-miR-875	0.268435	2.11573	0.169649	2.44483	1.13126	1.13126	0.220411	0.220411	0.595329	0.327869	0.164988	0.514593	0.215877	0.144315	0.433859	0.0460859	0.691156	0.483275
cfa-miR-374b	1.02911	0.141968	0.81214	0.0982985	0.514225	0.514225	1.3805	1.3805	0.74763	1.02418	0.641932	1.00044	1.59469	1.60224	1.57134	6.56903	1.32116	1.1036
cfa-miR-151	1.98229	0.316583	1.44454	0.274577	0.996254	0.996254	2.91408	2.91408	1.00267	0.513806	0.772849	0.8795	0.407541	3.13594	2.44873	10.9523	1.51479	0.379859
cfa-miR-202	0.0091937	0.0321073	0.0491964	0.0246392	0.0143914	0.0143914	0.00989478	0.00989478	0.0175408	0.00677694	0.0111151	0.0237308	0.00547726	0.00571748	0.0105936	0.00162004	0.00830673	0.0139703
cfa-miR-452	0.0186617	0.276908	0.0491964	0.107304	0.0967958	0.0967958	0.0292919	0.0292919	0.0346909	0.0319599	0.0628211	0.11156	0.0447129	0.01833	0.0307933	0.0133119	0.0382939	0.0368162
cfa-miR-183	0.0253169	0.0321073	0.0502126	0.0586725	0.0363925	0.0363925	0.0162056	0.0162056	0.0353256	0.032535	0.0463903	0.0813558	0.0170626	0.0123008	0.012809	0.0465831	0.0339007	0.0986496
cfa-miR-338	0.0091937	0.0321073	0.0491964	0.0246392	0.0348742	0.0348742	0.0153785	0.0153785	0.0184584	0.00677694	0.0116088	0.0237308	0.024496	0.0221196	0.0189768	0.0478928	0.0304522	0.0208606
cfa-miR-320	2.79504	8.96642	2.63822	4.62461	3.47313	3.47313	2.91636	2.91636	5.21195	6.22659	2.58875	4.40078	3.34013	2.65956	1.96244	4.5936	2.48682	3.2213
cfa-miR-185	0.414947	0.474361	0.614119	0.421678	0.321822	0.321822	0.878517	0.878517	0.297136	2.43463	0.828535	0.469727	0.482774	0.804297	0.61824	1.39531	0.338118	0.294885
cfa-miR-207	0.183346	0.367544	0.312404	0.281379	0.219103	0.219103	0.137832	0.137832	0.285625	0.119161	0.144773	0.287728	0.150025	0.108621	0.15142	0.0261356	0.12345	0.218384
cfa-miR-485	0.0091937	0.0418803	0.0491964	0.0443202	0.0193041	0.0193041	0.0170607	0.0170607	0.0805754	0.0131756	0.0111151	0.0483164	0.0106218	0.0113651	0.018036	0.00595239	0.0254548	0.0360799
cfa-miR-448	0.0091937	0.0321073	0.0491964	0.0246392	0.0143914	0.0143914	0.00989478	0.00989478	0.0175408	0.00677694	0.0111151	0.0237308	0.00547726	0.00571748	0.0105936	0.00162004	0.00830673	0.0139703
cfa-miR-142	27.2528	13.349	16.3325	20.2458	18.0794	18.0794	23.141	23.141	12.6126	33.8992	25.4769	17.2346	17.1663	19.1823	16.2762	25.8959	12.7516	12.5071
cfa-miR-130b	0.608494	0.884141	0.491825	0.549725	0.698651	0.698651	5.28504	5.28504	0.967203	1.30018	0.765106	0.652273	1.58735	0.989712	0.785135	2.5861	0.850485	0.479251
cfa-miR-18a	3.94896	3.66979	3.74923	2.88963	3.39242	3.39242	4.46706	4.46706	3.68985	23.0653	4.92936	1.798	3.8123	3.47775	3.92432	9.07185	3.53468	5.13124
cfa-miR-195	17.8904	5.03394	12.5545	8.17363	5.18101	5.18101	9.12296	9.12296	15.0703	67.6995	13.5117	21.7639	14.6342	19.1532	12.384	17.0018	13.704	25.3835
cfa-miR-381	0.019182	0.135107	0.0491964	0.0488677	0.0680785	0.0680785	0.0485496	0.0485496	0.0502135	0.0103131	0.0193985	0.102088	0.0302059	0.0240188	0.0248556	0.00682148	0.0616182	0.0722805
cfa-miR-196a	0.0330639	0.100414	0.0491964	0.13314	0.0819811	0.0819811	0.0353016	0.0353016	0.128879	0.046543	0.0529311	0.0919392	0.0824479	0.0607049	0.0639138	0.0372355	0.0780467	0.0998769
cfa-miR-30d	2.47463	1.0872	2.04283	1.48331	1.76195	1.76195	2.51393	2.51393	1.64066	2.16074	2.21147	1.59421	2.27375	3.05207	2.04969	6.94215	1.88167	1.19188
cfa-miR-362	0.637651	0.0782206	0.406913	0.0686232	0.487077	0.487077	1.77783	1.77783	0.370537	0.260397	0.448918	0.328126	0.858392	1.46897	1.27348	4.06032	0.682282	0.1491
cfa-miR-328	0.0918827	0.199823	0.136274	0.247867	0.185083	0.185083	0.134077	0.134077	0.172421	0.127056	0.129824	0.205582	0.121739	0.134357	0.147215	0.121503	0.183705	0.220584
cfa-miR-93	11.671	4.26946	3.59237	4.89402	3.15783	3.15783	5.21059	5.21059	6.51675	23.4944	9.138	6.73826	4.90327	7.23146	4.67774	7.74007	5.11173	9.31908
cfa-miR-99b	0.183677	0.504841	0.409283	0.453677	0.323707	0.323707	0.280855	0.280855	0.364212	0.202119	0.287269	0.341958	0.684848	0.291376	0.281589	0.326425	0.343405	0.467889
cfa-miR-20a	19.5754	7.5049	16.7458	7.3421	10.6899	10.6899	23.3527	23.3527	15.1888	44.179	21.052	17.1654	18.6032	22.3443	19.1436	50.5702	15.285	18.5002
cfa-miR-340	0.547399	0.113914	0.58296	0.321901	0.41452	0.41452	0.900008	0.900008	0.579079	0.363224	0.735175	0.285308	0.860086	0.700446	0.734552	3.96781	0.895296	0.528685
cfa-miR-92a	46.0643	30.3153	30.4738	30.6889	31.4145	31.4145	51.1613	51.1613	65.6938	182.257	46.8631	55.5896	43.7655	32.1048	34.8724	50.1979	28.0946	53.4726
cfa-miR-200b	0.0111296	0.0435045	0.0491964	0.0866643	0.0251395	0.0251395	0.0174462	0.0174462	0.0316772	0.00677694	0.0111151	0.0295468	0.0104413	0.00977745	0.0233158	0.00297874	0.0188493	0.0167118
cfa-miR-141	0.121055	0.0965204	0.21032	0.140187	0.100211	0.100211	0.0559865	0.0559865	0.161234	0.035891	0.170003	0.148395	0.0749383	0.0634691	0.0960211	0.059359	0.0290305	0.116653
cfa-miR-26b	15.1285	1.8891	11.8246	1.92202	7.38336	7.38336	18.5298	18.5298	12.0754	7.75561	8.62395	8.37332	26.5478	28.4867	29.0993	95.6076	17.936	11.1723
cfa-miR-369	0.0091937	0.0321073	0.0491964	0.0313752	0.45283	0.45283	0.00989478	0.00989478	0.0210401	0.00677694	0.0111151	0.0256865	0.00547726	0.0161326	0.0105936	0.00162004	0.0146112	0.0215533
cfa-miR-105a	0.00925581	0.0321073	0.0491964	0.0246392	0.0143914	0.0143914	0.0151256	0.0151256	0.0258527	0.00677694	0.0111151	0.0237308	0.00547726	0.00571748	0.0105936	0.00331621	0.00830673	0.0139703
cfa-miR-708	0.0091937	0.0321073	0.0491964	0.0246392	0.0143914	0.0143914	0.00989478	0.00989478	0.0175408	0.00984611	0.0111151	0.0237308	0.00547726	0.0118594	0.0140462	0.00422068	0.00830673	0.0139703
cfa-miR-200a	0.832169	2.40107	0.493543	2.34412	1.883	1.883	0.640434	0.640434	1.41212	0.553897	0.563348	1.43037	0.455969	0.496996	0.457715	0.1134	0.700526	1.00014
cfa-miR-216a	0.0158517	0.0517658	0.0491964	0.080527	0.0360978	0.0360978	0.0150644	0.0150644	0.0340272	0.0196001	0.0128524	0.0237308	0.0128494	0.0121573	0.0229937	0.00498084	0.0476594	0.037066
cfa-miR-758	0.0091937	0.0321073	0.0491964	0.0246392	0.0195777	0.0195777	0.00989478	0.00989478	0.0175408	0.00677694	0.0111151	0.0237308	0.00547726	3.27576	0.0105936	0.00232806	0.00830673	0.0139703
cfa-miR-149	0.0091937	0.0321073	0.0491964	0.0246492	0.0348233	0.0348233	0.00989478	0.00989478	0.0175408	0.0215903	0.0153051	0.0241366	0.0223627	0.0130095	0.0178969	0.0190144	0.0199259	0.0268828
cfa-miR-214	0.434437	4.69763	1.00356	0.858442	0.973287	0.973287	0.445364	0.445364	0.614578	0.364525	0.76716	0.740861	1.02575	0.433266	0.22646	0.194952	0.397036	0.622643
cfa-miR-491	0.0965362	0.0559463	0.0491964	0.154005	0.271188	0.271188	0.237988	0.237988	0.0922709	0.0793532	0.0794442	0.058701	0.0806513	0.123443	0.107942	0.240593	0.126408	1.22892
cfa-miR-134	0.0091937	0.0321073	0.0491964	0.0297552	0.0143914	0.0143914	0.00989478	0.00989478	0.0175408	0.00849267	0.0111151	0.0237308	0.00547726	0.00571748	0.0105936	0.00396191	0.0117623	0.0139703
cfa-miR-1271	0.746525	1.0309	0.444619	0.412222	0.591904	0.591904	1.13868	1.13868	0.760119	2.50131	1.00168	0.776353	0.880982	0.88153	0.473713	2.2621	0.68148	0.766637
cfa-let-7a	4.67477	2.06217	6.61959	1.60693	3.0151	3.0151	9.46864	9.46864	6.20115	5.07763	4.0165	2.70568	8.22192	15.0694	11.2976	27.427	7.38643	3.98646
cfa-miR-551a	0.0284958	0.0321073	0.0491964	0.0462192	0.0362678	0.0362678	0.017106	0.017106	0.029655	0.0113489	0.0211629	0.0277118	0.0724011	0.0255455	0.0147063	0.0417972	0.0265343	0.0193775
cfa-miR-208a	0.0305281	0.0915578	0.0491964	0.145027	0.0441323	0.0441323	0.0169737	0.0169737	0.0175408	0.00677694	0.0122742	0.0471163	0.0240431	0.0126735	0.0173252	0.00329018	0.0284001	0.0443678
cfa-miR-19a	49.3879	14.4865	46.193	25.0829	23.3165	23.3165	44.9683	44.9683	38.9971	148.821	70.5523	60.8731	44.3316	45.7769	37.6671	68.3145	34.6251	62.7342
cfa-miR-665	0.575687	3.20254	0.34291	4.20771	2.771	2.771	1.49762	1.49762	1.33552	0.867473	0.503671	1.13159	0.444238	0.295762	0.70365	0.0907161	1.3909	1.13494
cfa-miR-196b	0.028301	497.753	0.0995082	0.157143	0.0973356	0.0973356	0.0346749	0.0346749	0.103187	0.0500494	0.0343018	0.151933	0.107046	0.063323	0.0847898	0.0363637	0.0573891	0.0896622
cfa-miR-30b	10.763	4.97229	6.52918	5.70763	6.42467	6.42467	10.4707	10.4707	5.19084	8.75374	8.18299	4.53015	8.50916	5.44353	7.58734	19.4249	7.28209	5.25366
cfa-miR-99a	1.45276	1.13254	1.56574	1.1451	1.3317	1.3317	1.43574	1.43574	0.736373	0.97958	1.55381	0.819103	2.06024	1.31591	1.07725	2.46499	1.60214	1.12172
cfa-miR-133c // cfa-miR-133a // cfa-miR-133b	0.0813114	0.177718	0.233574	0.177155	0.120845	0.120845	0.0588666	0.0588666	0.0599719	0.086102	0.0310309	0.0651227	0.119833	0.111235	0.0871764	0.0504044	0.157911	0.159598

## Sheet: Table S2
Table S2. Predicted targets for cfa-let-7b, cfa-let-7c, and cfa-miR-103.
Human ortholog of target gene	Representative transcript	Gene name	Representative miRNA	Total context+ score a	Aggregate PCT b
HMGA2	NM_003483	high mobility group AT-hook 2	cfa-let-7b	-1	> 0.99
ARID3B	NM_006465	AT rich interactive domain 3B (BRIGHT-like)	cfa-let-7b	-0.84	> 0.99
FIGN	NM_018086	fidgetin	cfa-let-7b	-0.57	> 0.99
GPCPD1	NM_019593	glycerophosphocholine phosphodiesterase GDE1 homolog (S. cerevisiae)	cfa-let-7b	-0.46	> 0.99
IGF2BP2	NM_001007225	insulin-like growth factor 2 mRNA binding protein 2	cfa-let-7b	-0.45	> 0.99
IGF1R	NM_000875	insulin-like growth factor 1 receptor	cfa-let-7b	-0.45	> 0.99
FRAS1	NM_025074	Fraser syndrome 1	cfa-let-7b	-0.44	0.95
MAPK6	NM_002748	mitogen-activated protein kinase 6	cfa-let-7b	-0.38	0.94
FBXO32	NM_001242463	F-box protein 32	cfa-let-7b	-0.36	0.95
PLB1	NM_001170585	phospholipase B1	cfa-let-7b	-0.35	0.96
CEP135	NM_025009	centrosomal protein 135kDa	cfa-let-7b	-0.35	0.95
PLEKHG6	NM_001144856	pleckstrin homology domain containing, family G (with RhoGef domain) member 6	cfa-let-7b	-0.34	0.98
ARHGAP28	NM_001010000	Rho GTPase activating protein 28	cfa-let-7b	-0.33	0.95
WARS2	NM_015836	tryptophanyl tRNA synthetase 2, mitochondrial	cfa-let-7b	-0.27	< 0.1
IRS2	NM_003749	insulin receptor substrate 2	cfa-let-7b	-0.26	0.98
HMGA1	NM_002131	high mobility group AT-hook 1	cfa-let-7b	-0.24	0.94
C20orf112	NM_080616	chromosome 20 open reading frame 112	cfa-let-7b	-0.22	0.97
AKAP5	NM_004857	A kinase (PRKA) anchor protein 5	cfa-let-7b	-0.21	0.74
GRPEL2	NM_152407	GrpE-like 2, mitochondrial (E. coli)	cfa-let-7b	-0.2	0.93
NAP1L1	NM_004537	nucleosome assembly protein 1-like 1	cfa-let-7b	-0.2	> 0.99
SLAMF6	NM_001184714	SLAM family member 6	cfa-let-7b	-0.2	0.88
ELF4	NM_001127197	E74-like factor 4 (ets domain transcription factor)	cfa-let-7b	-0.19	0.94
FAM108C1	NM_021214	family with sequence similarity 108, member C1	cfa-let-7b	-0.18	0.72
PARD6B	NM_032521	par-6 partitioning defective 6 homolog beta (C. elegans)	cfa-let-7b	-0.18	0.95
ZNF641	NM_001172681	zinc finger protein 641	cfa-let-7b	-0.18	0.93
NPEPL1	NM_001204872	aminopeptidase-like 1	cfa-let-7b	-0.17	0.94
CDC42SE1	NM_001038707	CDC42 small effector 1	cfa-let-7b	-0.17	0.6
CNNM4	NM_020184	cyclin M4	cfa-let-7b	-0.16	0.95
TRABD	NM_025204	TraB domain containing	cfa-let-7b	-0.15	0.73
TAB2	NM_015093	TGF-beta activated kinase 1/MAP3K7 binding protein 2	cfa-let-7b	-0.15	0.83
GPR137	NM_001170726	G protein-coupled receptor 137	cfa-let-7b	-0.15	0.67
CTNS	NM_001031681	cystinosin, lysosomal cystine transporter	cfa-let-7b	-0.14	0.93
CRTAP	NM_006371	cartilage associated protein	cfa-let-7b	-0.14	0.94
RNF44	NM_014901	ring finger protein 44	cfa-let-7b	-0.14	0.94
AKT2	NM_001626	v-akt murine thymoma viral oncogene homolog 2	cfa-let-7b	-0.14	0.88
CALN1	NM_001017440	calneuron 1	cfa-let-7b	-0.14	0.92
TSPEAR	NM_144991	thrombospondin-type laminin G domain and EAR repeats	cfa-let-7b	-0.13	0.9
LOXL4	NM_032211	lysyl oxidase-like 4	cfa-let-7b	-0.13	0.94
POU2F2	NM_001207025	POU class 2 homeobox 2	cfa-let-7b	-0.13	0.89
LRRC8B	NM_001134476	leucine rich repeat containing 8 family, member B	cfa-let-7b	-0.13	0.88
ATP7B	NM_000053	ATPase, Cu++ transporting, beta polypeptide	cfa-let-7b	-0.12	0.93
PNKD	NM_015488	paroxysmal nonkinesigenic dyskinesia	cfa-let-7b	-0.12	0.76
IL28RA	NM_170743	interleukin 28 receptor, alpha (interferon, lambda receptor)	cfa-let-7b	-0.12	0.72
THAP6	NM_144721	THAP domain containing 6	cfa-let-7b	-0.11	0.76
PLAGL2	NM_002657	pleiomorphic adenoma gene-like 2	cfa-let-7b	-0.11	0.91
ZNF362	NM_152493	zinc finger protein 362	cfa-let-7b	-0.1	0.98
CACNA1D	NM_000720	calcium channel, voltage-dependent, L type, alpha 1D subunit	cfa-let-7b	-0.1	0.88
ZNF282	NM_003575	zinc finger protein 282	cfa-let-7b	-0.09	0.94
CASKIN1	NM_020764	CASK interacting protein 1	cfa-let-7b	-0.09	0.89
SLC8A2	NM_015063	solute carrier family 8 (sodium/calcium exchanger), member 2	cfa-let-7b	-0.08	0.91
PYGO2	NM_138300	pygopus homolog 2 (Drosophila)	cfa-let-7b	-0.08	0.92
EDA	NM_001005609	ectodysplasin A	cfa-let-7b	-0.08	0.92
KCNC4	NM_001039574	potassium voltage-gated channel, Shaw-related subfamily, member 4	cfa-let-7b	-0.07	0.84
SCAI	NM_001144877	suppressor of cancer cell invasion	cfa-let-7b	-0.07	0.75
PTP4A2	NM_001195100	protein tyrosine phosphatase type IVA, member 2	cfa-let-7b	-0.06	0.75
CD276	NM_001024736	CD276 molecule	cfa-let-7b	-0.05	0.71
RAB15	NM_198686	RAB15, member RAS onocogene family	cfa-let-7b	-0.05	0.91
SMAD2	NM_001003652	SMAD family member 2	cfa-let-7b	-0.05	0.95
WIPI2	NM_001033518	WD repeat domain, phosphoinositide interacting 2	cfa-let-7b	-0.03	0.9
LIMD1	NM_014240	LIM domains containing 1	cfa-let-7b	-0.03	0.92
SOST	NM_025237	sclerostin	cfa-let-7b	-0.02	0.87
MYCBP	NM_012333	c-myc binding protein	cfa-let-7c	-0.45	0.98
GATM	NM_001482	glycine amidinotransferase (L-arginine:glycine amidinotransferase)	cfa-let-7c	-0.41	0.96
TPP1	NM_000391	tripeptidyl peptidase I	cfa-let-7c	-0.39	0.97
PSORS1C2	NM_014069	psoriasis susceptibility 1 candidate 2	cfa-let-7c	-0.33	0.93
PPARGC1B	NM_001172698	peroxisome proliferator-activated receptor gamma, coactivator 1 beta	cfa-let-7c	-0.3	> 0.99
STYX	NM_001130701	serine/threonine/tyrosine interacting protein	cfa-let-7c	-0.29	0.97
SEMA4G	NM_001203244	sema domain, immunoglobulin domain (Ig), transmembrane domain (TM) and short cytoplasmic domain, (semaphorin) 4G	cfa-let-7c	-0.21	0.9
MASP1	NM_001879	mannan-binding lectin serine peptidase 1 (C4/C2 activating component of Ra-reactive factor)	cfa-let-7c	-0.21	0.92
SMAP2	NM_001198978	small ArfGAP2	cfa-let-7c	-0.2	0.82
OPA3	NM_001017989	optic atrophy 3 (autosomal recessive, with chorea and spastic paraplegia)	cfa-let-7c	-0.2	0.71
ASAH1	NM_001127505	N-acylsphingosine amidohydrolase (acid ceramidase) 1	cfa-let-7c	-0.2	0.64
GALNTL2	NM_054110	UDP-N-acetyl-alpha-D-galactosamine:polypeptide N-acetylgalactosaminyltransferase-like 2	cfa-let-7c	-0.19	0.94
THOC2	NM_001081550	THO complex 2	cfa-let-7c	-0.18	0.85
DZIP1	NM_014934	DAZ interacting protein 1	cfa-let-7c	-0.12	0.94
LIMD2	NM_030576	LIM domain containing 2	cfa-let-7c	-0.11	0.95
MUTED	NM_001199322	muted homolog (mouse)	cfa-let-7c	-0.11	0.82
SAMD12	NM_001101676	sterile alpha motif domain containing 12	cfa-let-7c	-0.09	0.94
TSC1	NM_000368	tuberous sclerosis 1	cfa-let-7c	-0.08	0.95
WNT16	NM_016087	wingless-type MMTV integration site family, member 16	cfa-miR-103	-0.72	< 0.1
CCDC152	NM_001134848	coiled-coil domain containing 152	cfa-miR-103	-0.52	< 0.1
NDRG4	NM_001130487	NDRG family member 4	cfa-miR-103	-0.49	< 0.1
SMEK2	NM_001122964	SMEK homolog 2, suppressor of mek1 (Dictyostelium)	cfa-miR-103	-0.44	< 0.1
PLA2G2F	NM_022819	phospholipase A2, group IIF	cfa-miR-103	-0.44	< 0.1
MYNN	NM_001185118	myoneurin	cfa-miR-103	-0.41	< 0.1
LAPTM4A	NM_014713	lysosomal protein transmembrane 4 alpha	cfa-miR-103	-0.41	< 0.1
OLFM1	NM_006334	olfactomedin 1	cfa-miR-103	-0.4	< 0.1
GATAD2A	NM_017660	GATA zinc finger domain containing 2A	cfa-miR-103	-0.37	< 0.1
ABI3BP	NM_015429	ABI family, member 3 (NESH) binding protein	cfa-miR-103	-0.37	< 0.1
CDK12	NM_015083	cyclin-dependent kinase 12	cfa-miR-103	-0.36	< 0.1
ATPBD4	NM_001141972	ATP binding domain 4	cfa-miR-103	-0.34	< 0.1
FUCA2	NM_032020	fucosidase, alpha-L- 2, plasma	cfa-miR-103	-0.33	< 0.1
TLK2	NM_001112707	tousled-like kinase 2	cfa-miR-103	-0.33	< 0.1
PTPLAD1	NM_016395	protein tyrosine phosphatase-like A domain containing 1	cfa-miR-103	-0.33	< 0.1
PAQR5	NM_001104554	progestin and adipoQ receptor family member V	cfa-miR-103	-0.27	< 0.1
CLIP1	NM_002956	CAP-GLY domain containing linker protein 1	cfa-miR-103	-0.26	< 0.1
MBNL2	NM_144778	muscleblind-like 2 (Drosophila)	cfa-miR-103	-0.25	< 0.1
C20orf177	NM_001190826	chromosome 20 open reading frame 177	cfa-miR-103	-0.24	< 0.1
TMEM123	NM_052932	transmembrane protein 123	cfa-miR-103	-0.23	< 0.1
ADM2	NM_024866	adrenomedullin 2	cfa-miR-103	-0.23	< 0.1
SPAG9	NM_001130528	sperm associated antigen 9	cfa-miR-103	-0.23	< 0.1
IRF2BP2	NM_001077397	interferon regulatory factor 2 binding protein 2	cfa-miR-103	-0.22	< 0.1
MTUS2	NM_001033602	microtubule associated tumor suppressor candidate 2	cfa-miR-103	-0.22	< 0.1
RPGRIP1L	NM_001127897	RPGRIP1-like	cfa-miR-103	-0.2	< 0.1
RBM8A	NM_005105	RNA binding motif protein 8A	cfa-miR-103	-0.19	< 0.1
HNMT	NM_006895	histamine N-methyltransferase	cfa-miR-103	-0.19	< 0.1
PI15	NM_015886	peptidase inhibitor 15	cfa-miR-103	-0.16	< 0.1
EIF1AX	NM_001412	eukaryotic translation initiation factor 1A, X-linked	cfa-miR-103	-0.15	< 0.1
C9orf25	NM_001184940	chromosome 9 open reading frame 25	cfa-miR-103	-0.14	< 0.1
PRPF4B	NM_003913	PRP4 pre-mRNA processing factor 4 homolog B (yeast)	cfa-miR-103	-0.11	< 0.1
LARP4	NM_001170803	La ribonucleoprotein domain family, member 4	cfa-miR-103	-0.08	< 0.1
SEC22C	NM_032970	SEC22 vesicle trafficking protein homolog C (S. cerevisiae)	cfa-miR-103	> -0.03	< 0.1
RNF19A	NM_015435	ring finger protein 19A	cfa-miR-103	N/A	< 0.1
DICER1	NM_001195573	dicer 1, ribonuclease type III	cfa-miR-103	-0.73	0.99
BACH2	NM_001170794	BTB and CNC homology 1, basic leucine zipper transcription factor 2	cfa-miR-103	-0.17	0.98
NPAS3	NM_001164749	neuronal PAS domain protein 3	cfa-miR-103	-0.61	0.94
NFIA	NM_001134673	nuclear factor I/A	cfa-miR-103	-0.37	0.94
PRKCE	NM_005400	protein kinase C, epsilon	cfa-miR-103	-0.36	0.94
MED26	NM_004831	mediator complex subunit 26	cfa-miR-103	-0.65	0.93
ACVR2B	NM_001106	activin A receptor, type IIB	cfa-miR-103	-0.46	0.93
SNRK	NM_001100594	SNF related kinase	cfa-miR-103	-0.45	0.93
AGFG1	NM_001135187	ArfGAP with FG repeats 1	cfa-miR-103	-0.5	0.92
NOS1	NM_000620	nitric oxide synthase 1 (neuronal)	cfa-miR-103	-0.46	0.92
CHD2	NM_001271	chromodomain helicase DNA binding protein 2	cfa-miR-103	-0.24	0.91
DYRK2	NM_003583	dual-specificity tyrosine-(Y)-phosphorylation regulated kinase 2	cfa-miR-103	-0.63	0.9
TRAF3	NM_001199427	TNF receptor-associated factor 3	cfa-miR-103	-0.12	0.9
COPS2	NM_001143887	COP9 constitutive photomorphogenic homolog subunit 2 (Arabidopsis)	cfa-miR-103	-0.36	0.89
PDS5A	NM_001100399	PDS5, regulator of cohesion maintenance, homolog A (S. cerevisiae)	cfa-miR-103	-0.49	0.88
GALNT7	NM_017423	UDP-N-acetyl-alpha-D-galactosamine:polypeptide N-acetylgalactosaminyltransferase 7 (GalNAc-T7)	cfa-miR-103	-0.36	0.88
ATP13A3	NM_024524	ATPase type 13A3	cfa-miR-103	-0.36	0.88
NF1	NM_000267	neurofibromin 1	cfa-miR-103	-0.69	0.87
FAF2	NM_014613	Fas associated factor family member 2	cfa-miR-103	-0.39	0.87
RASSF5	NM_182663	Ras association (RalGDS/AF-6) domain family member 5	cfa-miR-103	-0.35	0.87
RIMS3	NM_014747	regulating synaptic membrane exocytosis 3	cfa-miR-103	-0.15	0.87
GPC6	NM_005708	glypican 6	cfa-miR-103	-0.51	0.86
CPEB3	NM_001178137	cytoplasmic polyadenylation element binding protein 3	cfa-miR-103	-0.4	0.86
PHF20	NM_016436	PHD finger protein 20	cfa-miR-103	-0.39	0.86
NAV1	NM_001167738	neuron navigator 1	cfa-miR-103	-0.15	0.86
CCNYL1	NM_001142300	cyclin Y-like 1	cfa-miR-103	-0.55	0.85
INO80D	NM_017759	INO80 complex subunit D	cfa-miR-103	-0.15	0.85
TPD52	NM_001025252	tumor protein D52	cfa-miR-103	-0.65	0.84
RNF38	NM_022781	ring finger protein 38	cfa-miR-103	-0.49	0.84
PEG10	NM_001040152	paternally expressed 10	cfa-miR-103	-0.02	0.84
TWF1	NM_001242397	twinfilin, actin-binding protein, homolog 1 (Drosophila)	cfa-miR-103	-0.41	0.83
RASSF8	NM_001164746	Ras association (RalGDS/AF-6) domain family (N-terminal) member 8	cfa-miR-103	-0.37	0.83
BAZ2A	NM_013449	bromodomain adjacent to zinc finger domain, 2A	cfa-miR-103	-0.3	0.83
AXIN2	NM_004655	axin 2	cfa-miR-103	-0.36	0.82
RORA	NM_002943	RAR-related orphan receptor A	cfa-miR-103	-0.2	0.82
SRGAP1	NM_020762	SLIT-ROBO Rho GTPase activating protein 1	cfa-miR-103	-0.33	0.81
CHIC1	NM_001039840	cysteine-rich hydrophobic domain 1	cfa-miR-103	-0.25	0.81
KRTAP4-4	NM_032524	keratin associated protein 4-4	cfa-miR-103	-0.31	0.8
AMMECR1	NM_001025580	Alport syndrome, mental retardation, midface hypoplasia and elliptocytosis chromosomal region gene 1	cfa-miR-103	-0.15	0.8
TNRC6B	NM_001024843	trinucleotide repeat containing 6B	cfa-miR-103	-0.19	0.79
LCOR	NM_001170765	ligand dependent nuclear receptor corepressor	cfa-miR-103	-0.11	0.79
MYH9	NM_002473	myosin, heavy chain 9, non-muscle	cfa-miR-103	-0.55	0.78
WNT3A	NM_033131	wingless-type MMTV integration site family, member 3A	cfa-miR-103	-0.49	0.78
UBE2R2	NM_017811	ubiquitin-conjugating enzyme E2R 2	cfa-miR-103	-0.45	0.78
ELK4	NM_001973	ELK4, ETS-domain protein (SRF accessory protein 1)	cfa-miR-103	-0.34	0.78
ADCYAP1	NM_001099733	adenylate cyclase activating polypeptide 1 (pituitary)	cfa-miR-103	-0.39	0.77
ATXN7L1	NM_020725	ataxin 7-like 1	cfa-miR-103	-0.2	0.77
ZNRF2	NM_147128	zinc and ring finger 2	cfa-miR-103	-0.68	0.76
ARIH2	NM_006321	ariadne homolog 2 (Drosophila)	cfa-miR-103	-0.45	0.76
CAMKK1	NM_032294	calcium/calmodulin-dependent protein kinase kinase 1, alpha	cfa-miR-103	-0.42	0.76
DCLK1	NM_001195415	doublecortin-like kinase 1	cfa-miR-103	-0.39	0.76
PLEKHA1	NM_001001974	pleckstrin homology domain containing, family A (phosphoinositide binding specific) member 1	cfa-miR-103	-0.36	0.76
RPS6KA3	NM_004586	ribosomal protein S6 kinase, 90kDa, polypeptide 3	cfa-miR-103	-0.21	0.76
UPF2	NM_015542	UPF2 regulator of nonsense transcripts homolog (yeast)	cfa-miR-103	-0.59	0.75
PPPDE2	NM_015704	PPPDE peptidase domain containing 2	cfa-miR-103	-0.4	0.75
CDK6	NM_001145306	cyclin-dependent kinase 6	cfa-miR-103	-0.22	0.75
SPRY3	NM_005840	sprouty homolog 3 (Drosophila)	cfa-miR-103	-0.05	0.75
ATF7	NM_001130059	activating transcription factor 7	cfa-miR-103	-0.51	0.74
ZC3H7B	NM_017590	zinc finger CCCH-type containing 7B	cfa-miR-103	-0.5	0.74
USP45	NM_001080481	ubiquitin specific peptidase 45	cfa-miR-103	-0.49	0.74
KIAA0528	NM_014802	KIAA0528	cfa-miR-103	-0.47	0.74
PPP6R2	NM_001242898	protein phosphatase 6, regulatory subunit 2	cfa-miR-103	-0.46	0.74
SUN2	NM_001199579	Sad1 and UNC84 domain containing 2	cfa-miR-103	-0.46	0.74
CXorf23	NM_198279	chromosome X open reading frame 23	cfa-miR-103	-0.46	0.74
ZFPM2	NM_012082	zinc finger protein, multitype 2	cfa-miR-103	-0.45	0.74
2015-03-03	NM_178450	membrane-associated ring finger (C3HC4) 3	cfa-miR-103	-0.44	0.74
PTPLB	NM_198402	protein tyrosine phosphatase-like (proline instead of catalytic arginine), member b	cfa-miR-103	-0.43	0.74
ARMC1	NM_018120	armadillo repeat containing 1	cfa-miR-103	-0.43	0.74
CACNA2D1	NM_000722	calcium channel, voltage-dependent, alpha 2/delta subunit 1	cfa-miR-103	-0.43	0.74
ZNF654	NM_018293	zinc finger protein 654	cfa-miR-103	-0.43	0.74
CHD1	NM_001270	chromodomain helicase DNA binding protein 1	cfa-miR-103	-0.41	0.74
MTMR12	NM_001040446	myotubularin related protein 12	cfa-miR-103	-0.4	0.74
JHDM1D	NM_030647	jumonji C domain containing histone demethylase 1 homolog D (S. cerevisiae)	cfa-miR-103	-0.4	0.74
TBKBP1	NM_014726	TBK1 binding protein 1	cfa-miR-103	-0.38	0.74
SPATS2L	NM_001100422	spermatogenesis associated, serine-rich 2-like	cfa-miR-103	-0.36	0.74
NDEL1	NM_001025579	nudE nuclear distribution gene E homolog (A. nidulans)-like 1	cfa-miR-103	-0.36	0.74
NRP2	NM_018534	neuropilin 2	cfa-miR-103	-0.36	0.74
NPAS2	NM_002518	neuronal PAS domain protein 2	cfa-miR-103	-0.35	0.74
PPIP5K2	NM_015216	diphosphoinositol pentakisphosphate kinase 2	cfa-miR-103	-0.34	0.74
HELZ	NM_014877	helicase with zinc finger	cfa-miR-103	-0.34	0.74
PRRT2	NM_145239	proline-rich transmembrane protein 2	cfa-miR-103	-0.33	0.74
ITSN1	NM_001001132	intersectin 1 (SH3 domain protein)	cfa-miR-103	-0.33	0.74
GREM2	NM_022469	gremlin 2	cfa-miR-103	-0.31	0.74
N4BP1	NM_153029	NEDD4 binding protein 1	cfa-miR-103	-0.31	0.74
EIF4B	NM_001417	eukaryotic translation initiation factor 4B	cfa-miR-103	-0.3	0.74
C6orf204	NM_001042475	chromosome 6 open reading frame 204	cfa-miR-103	-0.29	0.74
CELSR2	NM_001408	cadherin, EGF LAG seven-pass G-type receptor 2 (flamingo homolog, Drosophila)	cfa-miR-103	-0.26	0.74
WNT4	NM_030761	wingless-type MMTV integration site family, member 4	cfa-miR-103	-0.25	0.74
CSNK1G2	NM_001319	casein kinase 1, gamma 2	cfa-miR-103	-0.24	0.74
YTHDC1	NM_001031732	YTH domain containing 1	cfa-miR-103	-0.24	0.74
CCDC50	NM_174908	coiled-coil domain containing 50	cfa-miR-103	-0.23	0.74
VCL	NM_003373	vinculin	cfa-miR-103	-0.23	0.74
ANKRD52	NM_173595	ankyrin repeat domain 52	cfa-miR-103	-0.22	0.74
CASK	NM_001126054	calcium/calmodulin-dependent serine protein kinase (MAGUK family)	cfa-miR-103	-0.21	0.74
MBNL1	NM_021038	muscleblind-like (Drosophila)	cfa-miR-103	-0.2	0.74
TMEM184B	NM_001195071	transmembrane protein 184B	cfa-miR-103	-0.19	0.74
MEGF11	NM_032445	multiple EGF-like-domains 11	cfa-miR-103	-0.18	0.74
KPNA1	NM_002264	karyopherin alpha 1 (importin alpha 5)	cfa-miR-103	-0.17	0.74
MBNL3	NM_001170701	muscleblind-like 3 (Drosophila)	cfa-miR-103	> -0.03	0.74
DSEL	NM_032160	dermatan sulfate epimerase-like	cfa-miR-103	N/A	0.74
JAKMIP2	NM_014790	janus kinase and microtubule interacting protein 2	cfa-miR-103	-0.46	0.73
JUB	NM_032876	jub, ajuba homolog (Xenopus laevis)	cfa-miR-103	-0.4	0.73
ANO3	NM_031418	anoctamin 3	cfa-miR-103	-0.4	0.73
SVEP1	NM_153366	sushi, von Willebrand factor type A, EGF and pentraxin domain containing 1	cfa-miR-103	-0.36	0.73
RAI14	NM_001145520	retinoic acid induced 14	cfa-miR-103	-0.35	0.73
APBA1	NM_001163	amyloid beta (A4) precursor protein-binding, family A, member 1	cfa-miR-103	-0.35	0.73
POGLUT1	NM_152305	protein O-glucosyltransferase 1	cfa-miR-103	-0.34	0.73
SCAF11	NM_004719	SR-related CTD-associated factor 11	cfa-miR-103	-0.34	0.73
KIF5A	NM_004984	kinesin family member 5A	cfa-miR-103	-0.34	0.73
C16orf72	NM_014117	chromosome 16 open reading frame 72	cfa-miR-103	-0.33	0.73
DUS1L	NM_022156	dihydrouridine synthase 1-like (S. cerevisiae)	cfa-miR-103	-0.33	0.73
KIAA2018	NM_001009899	KIAA2018	cfa-miR-103	-0.3	0.73
ASH1L	NM_018489	ash1 (absent, small, or homeotic)-like (Drosophila)	cfa-miR-103	-0.29	0.73
BDNF	NM_001143805	brain-derived neurotrophic factor	cfa-miR-103	-0.29	0.73
SIX4	NM_017420	SIX homeobox 4	cfa-miR-103	-0.29	0.73
PCGF5	NM_032373	polycomb group ring finger 5	cfa-miR-103	-0.28	0.73
DCP1A	NM_018403	DCP1 decapping enzyme homolog A (S. cerevisiae)	cfa-miR-103	-0.26	0.73
ZBTB39	NM_014830	zinc finger and BTB domain containing 39	cfa-miR-103	-0.24	0.73
TGFBR3	NM_001195683	transforming growth factor, beta receptor III	cfa-miR-103	-0.23	0.73
ZMYM2	NM_001190964	zinc finger, MYM-type 2	cfa-miR-103	-0.23	0.73
ZHX3	NM_015035	zinc fingers and homeoboxes 3	cfa-miR-103	-0.22	0.73
RNF125	NM_017831	ring finger protein 125	cfa-miR-103	-0.21	0.73
GPATCH8	NM_001002909	G patch domain containing 8	cfa-miR-103	-0.21	0.73
PIK3R1	NM_001242466	phosphoinositide-3-kinase, regulatory subunit 1 (alpha)	cfa-miR-103	-0.2	0.73
FOXJ2	NM_018416	forkhead box J2	cfa-miR-103	-0.2	0.73
COL22A1	NM_152888	collagen, type XXII, alpha 1	cfa-miR-103	-0.18	0.73
FGF7	NM_002009	fibroblast growth factor 7	cfa-miR-103	-0.17	0.73
CHST11	NM_001173982	carbohydrate (chondroitin 4) sulfotransferase 11	cfa-miR-103	-0.17	0.73
ZC3H12C	NM_033390	zinc finger CCCH-type containing 12C	cfa-miR-103	-0.07	0.73
TLK1	NM_001136554	tousled-like kinase 1	cfa-miR-103	-0.06	0.73
SGMS2	NM_001136257	sphingomyelin synthase 2	cfa-miR-103	-0.39	0.72
ANK1	NM_000037	ankyrin 1, erythrocytic	cfa-miR-103	-0.35	0.72
HIC2	NM_015094	hypermethylated in cancer 2	cfa-miR-103	-0.34	0.72
KIF21A	NM_001173463	kinesin family member 21A	cfa-miR-103	-0.29	0.72
KIAA1033	NM_015275	KIAA1033	cfa-miR-103	-0.29	0.72
ETNK1	NM_018638	ethanolamine kinase 1	cfa-miR-103	-0.28	0.72
NOVA1	NM_002515	neuro-oncological ventral antigen 1	cfa-miR-103	-0.27	0.72
LOC388630	NM_001194986	UPF0632 protein A	cfa-miR-103	-0.26	0.72
G3BP2	NM_012297	GTPase activating protein (SH3 domain) binding protein 2	cfa-miR-103	-0.25	0.72
LRP2	NM_004525	low density lipoprotein receptor-related protein 2	cfa-miR-103	-0.25	0.72
C14orf101	NM_017799	chromosome 14 open reading frame 101	cfa-miR-103	-0.25	0.72
LRRC32	NM_001128922	leucine rich repeat containing 32	cfa-miR-103	-0.23	0.72
DCUN1D4	NM_001040402	DCN1, defective in cullin neddylation 1, domain containing 4 (S. cerevisiae)	cfa-miR-103	-0.16	0.72
CALU	NM_001130674	calumenin	cfa-miR-103	-0.16	0.72
CDK5R1	NM_003885	cyclin-dependent kinase 5, regulatory subunit 1 (p35)	cfa-miR-103	-0.14	0.72
C12orf53	NM_153685	chromosome 12 open reading frame 53	cfa-miR-103	-0.12	0.72
IHH	NM_002181	Indian hedgehog	cfa-miR-103	-0.12	0.72
LRRC8D	NM_001134479	leucine rich repeat containing 8 family, member D	cfa-miR-103	-0.12	0.72
TGIF2	NM_001199513	TGFB-induced factor homeobox 2	cfa-miR-103	-0.1	0.72
CSMD1	NM_033225	CUB and Sushi multiple domains 1	cfa-miR-103	-0.1	0.72
HLF	NM_002126	hepatic leukemia factor	cfa-miR-103	-0.08	0.72
RNF24	NM_001134337	ring finger protein 24	cfa-miR-103	-0.02	0.72
UBE4A	NM_001204077	ubiquitination factor E4A	cfa-miR-103	-0.52	0.71
PCGF2	NM_007144	polycomb group ring finger 2	cfa-miR-103	-0.49	0.71
PPP6C	NM_001123355	protein phosphatase 6, catalytic subunit	cfa-miR-103	-0.43	0.71
ST8SIA3	NM_015879	ST8 alpha-N-acetyl-neuraminide alpha-2,8-sialyltransferase 3	cfa-miR-103	-0.36	0.71
NUP50	NM_007172	nucleoporin 50kDa	cfa-miR-103	-0.33	0.71
AFF4	NM_014423	AF4/FMR2 family, member 4	cfa-miR-103	-0.28	0.71
KIF23	NM_004856	kinesin family member 23	cfa-miR-103	-0.27	0.71
FAM73A	NM_198549	family with sequence similarity 73, member A	cfa-miR-103	-0.26	0.71
HNRNPA2B1	NM_002137	heterogeneous nuclear ribonucleoprotein A2/B1	cfa-miR-103	-0.25	0.71
FGF2	NM_002006	fibroblast growth factor 2 (basic)	cfa-miR-103	-0.24	0.71
TTL	NM_153712	tubulin tyrosine ligase	cfa-miR-103	-0.2	0.71
STYX	NM_001130701	serine/threonine/tyrosine interacting protein	cfa-miR-103	-0.19	0.71
KIAA1804	NM_032435	mixed lineage kinase 4	cfa-miR-103	-0.18	0.71
SLAIN2	NM_020846	SLAIN motif family, member 2	cfa-miR-103	-0.11	0.71
UNC80	NM_032504	unc-80 homolog (C. elegans)	cfa-miR-103	-0.11	0.71
C20orf112	NM_080616	chromosome 20 open reading frame 112	cfa-miR-103	-0.1	0.71
CECR6	NM_001163079	cat eye syndrome chromosome region, candidate 6	cfa-miR-103	-0.1	0.71
ABL2	NM_001136000	v-abl Abelson murine leukemia viral oncogene homolog 2	cfa-miR-103	-0.09	0.71
GIT2	NM_001135213	G protein-coupled receptor kinase interacting ArfGAP 2	cfa-miR-103	-0.51	0.7
SUFU	NM_016169	suppressor of fused homolog (Drosophila)	cfa-miR-103	-0.42	0.7
SYT6	NM_205848	synaptotagmin VI	cfa-miR-103	-0.32	0.7
FBXO10	NM_012166	F-box protein 10	cfa-miR-103	-0.31	0.7
ADAMTSL3	NM_207517	ADAMTS-like 3	cfa-miR-103	-0.31	0.7
VPS4A	NM_013245	vacuolar protein sorting 4 homolog A (S. cerevisiae)	cfa-miR-103	-0.29	0.7
STRN	NM_003162	striatin, calmodulin binding protein	cfa-miR-103	-0.29	0.7
TM7SF3	NM_016551	transmembrane 7 superfamily member 3	cfa-miR-103	-0.21	0.7
DLG4	NM_001128827	discs, large homolog 4 (Drosophila)	cfa-miR-103	-0.2	0.7
MTF1	NM_005955	metal-regulatory transcription factor 1	cfa-miR-103	-0.15	0.7
AK4	NM_001005353	adenylate kinase 4	cfa-miR-103	-0.13	0.7
ZDHHC3	NM_001135179	zinc finger, DHHC-type containing 3	cfa-miR-103	> -0.03	0.7
SCAI	NM_001144877	suppressor of cancer cell invasion	cfa-miR-103	> -0.02	0.7
TLE4	NM_007005	transducin-like enhancer of split 4 (E(sp1) homolog, Drosophila)	cfa-miR-103	-0.3	0.69
SLC20A2	NM_006749	solute carrier family 20 (phosphate transporter), member 2	cfa-miR-103	-0.3	0.69
SCAMP5	NM_001178111	secretory carrier membrane protein 5	cfa-miR-103	-0.28	0.69
FAM60A	NM_001135811	family with sequence similarity 60, member A	cfa-miR-103	-0.24	0.69
FRYL	NM_015030	FRY-like	cfa-miR-103	-0.22	0.69
AK2	NM_001199199	adenylate kinase 2	cfa-miR-103	-0.22	0.69
GLUD1	NM_005271	glutamate dehydrogenase 1	cfa-miR-103	-0.19	0.69
SIPA1L2	NM_020808	signal-induced proliferation-associated 1 like 2	cfa-miR-103	-0.17	0.69
CCNJL	NM_024565	cyclin J-like	cfa-miR-103	-0.1	0.69
SLC8A2	NM_015063	solute carrier family 8 (sodium/calcium exchanger), member 2	cfa-miR-103	-0.1	0.69
NUAK1	NM_014840	NUAK family, SNF1-like kinase, 1	cfa-miR-103	-0.09	0.69
PPM1E	NM_014906	protein phosphatase, Mg2+/Mn2+ dependent, 1E	cfa-miR-103	-0.07	0.69
FURIN	NM_002569	furin (paired basic amino acid cleaving enzyme)	cfa-miR-103	-0.07	0.69
TSPAN9	NM_001168320	tetraspanin 9	cfa-miR-103	-0.05	0.69
BTBD7	NM_001002860	BTB (POZ) domain containing 7	cfa-miR-103	-0.4	0.68
PHYHIPL	NM_001143774	phytanoyl-CoA 2-hydroxylase interacting protein-like	cfa-miR-103	-0.37	0.68
TSPAN5	NM_005723	tetraspanin 5	cfa-miR-103	-0.22	0.68
KPNA4	NM_002268	karyopherin alpha 4 (importin alpha 3)	cfa-miR-103	-0.17	0.68
AKAP2	NM_001004065	A kinase (PRKA) anchor protein 2	cfa-miR-103	-0.09	0.68
PALM2-AKAP2	NM_007203	PALM2-AKAP2 readthrough	cfa-miR-103	-0.09	0.68
NR2C2	NM_003298	nuclear receptor subfamily 2, group C, member 2	cfa-miR-103	-0.06	0.68
CRELD1	NM_001031717	cysteine-rich with EGF-like domains 1	cfa-miR-103	-0.04	0.68
C5orf41	NM_153607	chromosome 5 open reading frame 41	cfa-miR-103	> -0.03	0.68
GGA3	NM_001172703	golgi-associated, gamma adaptin ear containing, ARF binding protein 3	cfa-miR-103	-0.33	0.67
OSBPL6	NM_001201480	oxysterol binding protein-like 6	cfa-miR-103	-0.26	0.67
HMGA1	NM_002131	high mobility group AT-hook 1	cfa-miR-103	-0.26	0.67
CORO2B	NM_001190456	coronin, actin binding protein, 2B	cfa-miR-103	-0.25	0.67
ESR1	NM_000125	estrogen receptor 1	cfa-miR-103	-0.23	0.67
GNS	NM_002076	glucosamine (N-acetyl)-6-sulfatase	cfa-miR-103	-0.21	0.67
UBL3	NM_007106	ubiquitin-like 3	cfa-miR-103	-0.21	0.67
ENTPD7	NM_020354	ectonucleoside triphosphate diphosphohydrolase 7	cfa-miR-103	-0.2	0.67
ANK3	NM_001149	ankyrin 3, node of Ranvier (ankyrin G)	cfa-miR-103	-0.17	0.67
EN2	NM_001427	engrailed homeobox 2	cfa-miR-103	-0.16	0.67
CDC27	NM_001114091	cell division cycle 27 homolog (S. cerevisiae)	cfa-miR-103	-0.16	0.67
CNTNAP1	NM_003632	contactin associated protein 1	cfa-miR-103	-0.16	0.67
PRKG1	NM_001098512	protein kinase, cGMP-dependent, type I	cfa-miR-103	-0.15	0.67
YAF2	NM_001190977	YY1 associated factor 2	cfa-miR-103	-0.15	0.67
GPR124	NM_032777	G protein-coupled receptor 124	cfa-miR-103	-0.14	0.67
PURB	NM_033224	purine-rich element binding protein B	cfa-miR-103	-0.14	0.67
KCNC4	NM_001039574	potassium voltage-gated channel, Shaw-related subfamily, member 4	cfa-miR-103	-0.1	0.67
HIPK2	NM_001113239	homeodomain interacting protein kinase 2	cfa-miR-103	-0.07	0.67
CACNA1C	NM_000719	calcium channel, voltage-dependent, L type, alpha 1C subunit	cfa-miR-103	-0.07	0.67
PDE4D	NM_001104631	phosphodiesterase 4D, cAMP-specific	cfa-miR-103	-0.05	0.67
SLC2A13	NM_052885	solute carrier family 2 (facilitated glucose transporter), member 13	cfa-miR-103	-0.05	0.67
POLDIP2	NM_015584	polymerase (DNA-directed), delta interacting protein 2	cfa-miR-103	-0.28	0.66
KCNH1	NM_002238	potassium voltage-gated channel, subfamily H (eag-related), member 1	cfa-miR-103	-0.21	0.66
RNF157	NM_052916	ring finger protein 157	cfa-miR-103	-0.2	0.66
ZBTB8A	NM_001040441	zinc finger and BTB domain containing 8A	cfa-miR-103	-0.16	0.66
NMT2	NM_004808	N-myristoyltransferase 2	cfa-miR-103	-0.16	0.66
CTNND1	NM_001085458	catenin (cadherin-associated protein), delta 1	cfa-miR-103	-0.15	0.66
KIAA0232	NM_001100590	KIAA0232	cfa-miR-103	-0.14	0.66
SOCS7	NM_014598	suppressor of cytokine signaling 7	cfa-miR-103	-0.13	0.66
SBNO1	NM_001167856	strawberry notch homolog 1 (Drosophila)	cfa-miR-103	-0.13	0.66
PACSIN1	NM_001199583	protein kinase C and casein kinase substrate in neurons 1	cfa-miR-103	-0.09	0.66
KCMF1	NM_020122	potassium channel modulatory factor 1	cfa-miR-103	-0.08	0.66
GPCPD1	NM_019593	glycerophosphocholine phosphodiesterase GDE1 homolog (S. cerevisiae)	cfa-miR-103	-0.51	0.65
HERC2	NM_004667	hect domain and RLD 2	cfa-miR-103	-0.42	0.65
FAM117B	NM_173511	family with sequence similarity 117, member B	cfa-miR-103	-0.33	0.65
SLITRK1	NM_052910	SLIT and NTRK-like family, member 1	cfa-miR-103	-0.3	0.65
NRIP3	NM_020645	nuclear receptor interacting protein 3	cfa-miR-103	-0.27	0.65
LRP1B	NM_018557	low density lipoprotein receptor-related protein 1B	cfa-miR-103	-0.23	0.65
VAMP4	NM_001185127	vesicle-associated membrane protein 4	cfa-miR-103	-0.22	0.65
ZNF449	NM_152695	zinc finger protein 449	cfa-miR-103	-0.22	0.65
FBXW7	NM_001013415	F-box and WD repeat domain containing 7	cfa-miR-103	-0.2	0.65
EIF4EBP2	NM_004096	eukaryotic translation initiation factor 4E binding protein 2	cfa-miR-103	-0.19	0.65
PAFAH1B2	NM_002572	platelet-activating factor acetylhydrolase 1b, catalytic subunit 2 (30kDa)	cfa-miR-103	-0.18	0.65
KIAA0947	NM_015325	KIAA0947	cfa-miR-103	-0.18	0.65
FAM104A	NM_001098832	family with sequence similarity 104, member A	cfa-miR-103	-0.17	0.65
CARM1	NM_199141	coactivator-associated arginine methyltransferase 1	cfa-miR-103	-0.17	0.65
WHSC1	NM_007331	Wolf-Hirschhorn syndrome candidate 1	cfa-miR-103	-0.15	0.65
SOX6	NM_001145811	SRY (sex determining region Y)-box 6	cfa-miR-103	-0.15	0.65
NRIP1	NM_003489	nuclear receptor interacting protein 1	cfa-miR-103	-0.13	0.65
SARM1	NM_015077	sterile alpha and TIR motif containing 1	cfa-miR-103	-0.11	0.65
PLAG1	NM_001114634	pleiomorphic adenoma gene 1	cfa-miR-103	-0.1	0.65
PI4KB	NM_001198773	phosphatidylinositol 4-kinase, catalytic, beta	cfa-miR-103	-0.06	0.65
VCAN	NM_001126336	versican	cfa-miR-103	-0.47	0.64
PAG1	NM_018440	phosphoprotein associated with glycosphingolipid microdomains 1	cfa-miR-103	-0.39	0.64
FERMT2	NM_001134999	fermitin family member 2	cfa-miR-103	-0.34	0.64
ARMC8	NM_015396	armadillo repeat containing 8	cfa-miR-103	-0.31	0.64
NAA15	NM_057175	N(alpha)-acetyltransferase 15, NatA auxiliary subunit	cfa-miR-103	-0.26	0.64
USP42	NM_032172	ubiquitin specific peptidase 42	cfa-miR-103	-0.22	0.64
NAV2	NM_001111018	neuron navigator 2	cfa-miR-103	-0.21	0.64
AMOT	NM_001113490	angiomotin	cfa-miR-103	-0.15	0.64
CAMK2G	NM_001204492	calcium/calmodulin-dependent protein kinase II gamma	cfa-miR-103	-0.12	0.64
KIF3B	NM_004798	kinesin family member 3B	cfa-miR-103	-0.12	0.64
HCFC1	NM_005334	host cell factor C1 (VP16-accessory protein)	cfa-miR-103	-0.1	0.64
AP3M1	NM_012095	adaptor-related protein complex 3, mu 1 subunit	cfa-miR-103	-0.08	0.64
ARHGAP5	NM_001030055	Rho GTPase activating protein 5	cfa-miR-103	> -0.03	0.64
EFR3B	NM_014971	EFR3 homolog B (S. cerevisiae)	cfa-miR-103	-0.34	0.63
MEF2D	NM_005920	myocyte enhancer factor 2D	cfa-miR-103	-0.31	0.63
THY1	NM_006288	Thy-1 cell surface antigen	cfa-miR-103	-0.21	0.63
A2LD1	NM_001195087	AIG2-like domain 1	cfa-miR-103	-0.18	0.63
DLL1	NM_005618	delta-like 1 (Drosophila)	cfa-miR-103	-0.18	0.63
CD164L2	NM_207397	CD164 sialomucin-like 2	cfa-miR-103	-0.18	0.63
FAM110C	NM_001077710	family with sequence similarity 110, member C	cfa-miR-103	-0.17	0.63
GNPNAT1	NM_198066	glucosamine-phosphate N-acetyltransferase 1	cfa-miR-103	-0.17	0.63
MAF1	NM_032272	MAF1 homolog (S. cerevisiae)	cfa-miR-103	-0.15	0.63
PRR14L	NM_173566	proline rich 14-like	cfa-miR-103	-0.15	0.63
CC2D1B	NM_032449	coiled-coil and C2 domain containing 1B	cfa-miR-103	-0.14	0.63
JOSD1	NM_014876	Josephin domain containing 1	cfa-miR-103	-0.12	0.63
ANKRD57	NM_023016	ankyrin repeat domain 57	cfa-miR-103	-0.11	0.63
IPO9	NM_018085	importin 9	cfa-miR-103	-0.07	0.63
PVRL1	NM_002855	poliovirus receptor-related 1 (herpesvirus entry mediator C)	cfa-miR-103	-0.07	0.63
BCL2L2	NM_001199839	BCL2-like 2	cfa-miR-103	-0.03	0.63
PTGS2	NM_000963	prostaglandin-endoperoxide synthase 2 (prostaglandin G/H synthase and cyclooxygenase)	cfa-miR-103	-0.39	0.62
FEZF1	NM_001024613	FEZ family zinc finger 1	cfa-miR-103	-0.36	0.62
ZNRF3	NM_001206998	zinc and ring finger 3	cfa-miR-103	-0.31	0.62
COBLL1	NM_014900	COBL-like 1	cfa-miR-103	-0.3	0.62
SYDE2	NM_032184	synapse defective 1, Rho GTPase, homolog 2 (C. elegans)	cfa-miR-103	-0.28	0.62
NOTCH2	NM_024408	notch 2	cfa-miR-103	-0.27	0.62
KLHL18	NM_025010	kelch-like 18 (Drosophila)	cfa-miR-103	-0.2	0.62
SUZ12	NM_015355	suppressor of zeste 12 homolog (Drosophila)	cfa-miR-103	-0.17	0.62
GK	NM_000167	glycerol kinase	cfa-miR-103	-0.14	0.62
UBE2W	NM_001001481	ubiquitin-conjugating enzyme E2W (putative)	cfa-miR-103	-0.08	0.62
MAPK1IP1L	NM_144578	mitogen-activated protein kinase 1 interacting protein 1-like	cfa-miR-103	-0.05	0.62
CNOT6L	NM_144571	CCR4-NOT transcription complex, subunit 6-like	cfa-miR-103	-0.04	0.62
FBXL18	NM_024963	F-box and leucine-rich repeat protein 18	cfa-miR-103	> -0.02	0.62
CDV3	NM_001134422	CDV3 homolog (mouse)	cfa-miR-103	> -0.01	0.62
THSD7A	NM_015204	thrombospondin, type I, domain containing 7A	cfa-miR-103	-0.41	0.61
ZNF770	NM_014106	zinc finger protein 770	cfa-miR-103	-0.35	0.61
GNAI3	NM_006496	guanine nucleotide binding protein (G protein), alpha inhibiting activity polypeptide 3	cfa-miR-103	-0.32	0.61
TMEM20	NM_001134658	transmembrane protein 20	cfa-miR-103	-0.26	0.61
FAT4	NM_024582	FAT tumor suppressor homolog 4 (Drosophila)	cfa-miR-103	-0.23	0.61
DENND1B	NM_001195215	DENN/MADD domain containing 1B	cfa-miR-103	-0.21	0.61
WNK1	NM_001184985	WNK lysine deficient protein kinase 1	cfa-miR-103	-0.2	0.61
FAM134C	NM_178126	family with sequence similarity 134, member C	cfa-miR-103	-0.14	0.61
RDH10	NM_172037	retinol dehydrogenase 10 (all-trans)	cfa-miR-103	-0.13	0.61
KY	NM_178554	kyphoscoliosis peptidase	cfa-miR-103	> -0.02	0.61
FAM176A	NM_001135032	family with sequence similarity 176, member A	cfa-miR-103	-0.41	0.6
SCN2A	NM_001040142	sodium channel, voltage-gated, type II, alpha subunit	cfa-miR-103	-0.34	0.6
EIF2C1	NM_012199	eukaryotic translation initiation factor 2C, 1	cfa-miR-103	-0.25	0.6
SLC35A3	NM_012243	solute carrier family 35 (UDP-N-acetylglucosamine (UDP-GlcNAc) transporter), member A3	cfa-miR-103	-0.17	0.6
HIATL1	NM_032558	hippocampus abundant transcript-like 1	cfa-miR-103	-0.16	0.6
ATXN1L	NM_001137675	ataxin 1-like	cfa-miR-103	-0.05	0.6
MOBKL2B	NM_024761	MOB1, Mps One Binder kinase activator-like 2B (yeast)	cfa-miR-103	> -0.02	0.6
FLOT2	NM_004475	flotillin 2	cfa-miR-103	-0.59	0.59
GABRG2	NM_000816	gamma-aminobutyric acid (GABA) A receptor, gamma 2	cfa-miR-103	-0.46	0.59
ZCCHC2	NM_017742	zinc finger, CCHC domain containing 2	cfa-miR-103	-0.31	0.59
SYNDIG1	NM_024893	synapse differentiation inducing 1	cfa-miR-103	-0.29	0.59
EXOC5	NM_006544	exocyst complex component 5	cfa-miR-103	-0.22	0.59
SIK2	NM_015191	salt-inducible kinase 2	cfa-miR-103	-0.17	0.59
SLC5A3	NM_006933	solute carrier family 5 (sodium/myo-inositol cotransporter), member 3	cfa-miR-103	-0.17	0.59
FAM168B	NM_001009993	family with sequence similarity 168, member B	cfa-miR-103	-0.11	0.59
LRP1	NM_002332	low density lipoprotein receptor-related protein 1	cfa-miR-103	-0.09	0.59
FNBP1L	NM_001024948	formin binding protein 1-like	cfa-miR-103	-0.06	0.59
RAB15	NM_198686	RAB15, member RAS onocogene family	cfa-miR-103	N/A	0.59
C12orf76	NM_207435	chromosome 12 open reading frame 76	cfa-miR-103	-0.44	0.58
DCBLD2	NM_080927	discoidin, CUB and LCCL domain containing 2	cfa-miR-103	-0.31	0.58
SLC2A3	NM_006931	solute carrier family 2 (facilitated glucose transporter), member 3	cfa-miR-103	-0.25	0.58
RNMT	NM_003799	RNA (guanine-7-) methyltransferase	cfa-miR-103	-0.18	0.58
DKK1	NM_012242	dickkopf homolog 1 (Xenopus laevis)	cfa-miR-103	-0.17	0.58
AMOTL2	NM_016201	angiomotin like 2	cfa-miR-103	-0.17	0.58
SYNRG	NM_001163544	synergin, gamma	cfa-miR-103	-0.14	0.58
PSMF1	NM_006814	proteasome (prosome, macropain) inhibitor subunit 1 (PI31)	cfa-miR-103	-0.11	0.58
APCDD1L	NM_153360	adenomatosis polyposis coli down-regulated 1-like	cfa-miR-103	-0.11	0.58
CCDC6	NM_005436	coiled-coil domain containing 6	cfa-miR-103	-0.09	0.58
ARHGAP32	NM_001142685	Rho GTPase activating protein 32	cfa-miR-103	-0.06	0.58
RIF1	NM_001177663	RAP1 interacting factor homolog (yeast)	cfa-miR-103	-0.06	0.58
MFAP3	NM_001135037	microfibrillar-associated protein 3	cfa-miR-103	-0.03	0.58
TDG	NM_003211	thymine-DNA glycosylase	cfa-miR-103	-0.42	0.57
ZNF711	NM_021998	zinc finger protein 711	cfa-miR-103	-0.31	0.57
DLG5	NM_004747	discs, large homolog 5 (Drosophila)	cfa-miR-103	-0.29	0.57
BCL11A	NM_022893	B-cell CLL/lymphoma 11A (zinc finger protein)	cfa-miR-103	-0.24	0.57
GGA2	NM_015044	golgi-associated, gamma adaptin ear containing, ARF binding protein 2	cfa-miR-103	-0.17	0.57
FOXJ3	NM_001198850	forkhead box J3	cfa-miR-103	-0.17	0.57
SNX30	NM_001012994	sorting nexin family member 30	cfa-miR-103	-0.16	0.57
SLITRK3	NM_014926	SLIT and NTRK-like family, member 3	cfa-miR-103	-0.11	0.57
DCAF10	NM_024345	DDB1 and CUL4 associated factor 10	cfa-miR-103	-0.11	0.57
SH3BP4	NM_014521	SH3-domain binding protein 4	cfa-miR-103	-0.34	0.56
KPNA3	NM_002267	karyopherin alpha 3 (importin alpha 4)	cfa-miR-103	-0.19	0.56
TMEM35	NM_021637	transmembrane protein 35	cfa-miR-103	-0.15	0.56
CCNE1	NM_001238	cyclin E1	cfa-miR-103	-0.14	0.56
ADAMTSL2	NM_001145320	ADAMTS-like 2	cfa-miR-103	-0.12	0.56
PPP3R1	NM_000945	protein phosphatase 3, regulatory subunit B, alpha	cfa-miR-103	-0.1	0.56
FOXP1	NM_032682	forkhead box P1	cfa-miR-103	-0.7	0.55
YWHAH	NM_003405	tyrosine 3-monooxygenase/tryptophan 5-monooxygenase activation protein, eta polypeptide	cfa-miR-103	-0.29	0.55
GPR63	NM_001143957	G protein-coupled receptor 63	cfa-miR-103	-0.28	0.55
KIAA0247	NM_014734	KIAA0247	cfa-miR-103	-0.26	0.55
EIF2C4	NM_017629	eukaryotic translation initiation factor 2C, 4	cfa-miR-103	-0.26	0.55
ZYX	NM_001010972	zyxin	cfa-miR-103	-0.21	0.55
RAP2C	NM_021183	RAP2C, member of RAS oncogene family	cfa-miR-103	-0.2	0.55
BAI3	NM_001704	brain-specific angiogenesis inhibitor 3	cfa-miR-103	-0.19	0.55
SOS1	NM_005633	son of sevenless homolog 1 (Drosophila)	cfa-miR-103	-0.18	0.55
C18orf34	NM_001105528	chromosome 18 open reading frame 34	cfa-miR-103	-0.17	0.55
KLF4	NM_004235	Kruppel-like factor 4 (gut)	cfa-miR-103	-0.17	0.55
RUNX1T1	NM_001198625	runt-related transcription factor 1; translocated to, 1 (cyclin D-related)	cfa-miR-103	-0.16	0.55
NDOR1	NM_001144026	NADPH dependent diflavin oxidoreductase 1	cfa-miR-103	-0.15	0.55
SRSF6	NM_006275	serine/arginine-rich splicing factor 6	cfa-miR-103	-0.13	0.55
NFIB	NM_001190737	nuclear factor I/B	cfa-miR-103	-0.09	0.55
MAPKBP1	NM_001128608	mitogen-activated protein kinase binding protein 1	cfa-miR-103	-0.06	0.55
OTUD4	NM_001102653	OTU domain containing 4	cfa-miR-103	-0.51	0.54
DPYSL3	NM_001197294	dihydropyrimidinase-like 3	cfa-miR-103	-0.29	0.54
FAM81A	NM_152450	family with sequence similarity 81, member A	cfa-miR-103	-0.23	0.54
MXD4	NM_006454	MAX dimerization protein 4	cfa-miR-103	-0.23	0.54
CDC23	NM_004661	cell division cycle 23 homolog (S. cerevisiae)	cfa-miR-103	-0.2	0.54
EFNB2	NM_004093	ephrin-B2	cfa-miR-103	-0.18	0.54
FAM126B	NM_173822	family with sequence similarity 126, member B	cfa-miR-103	-0.17	0.54
WASF3	NM_006646	WAS protein family, member 3	cfa-miR-103	-0.15	0.54
APPL1	NM_012096	adaptor protein, phosphotyrosine interaction, PH domain and leucine zipper containing 1	cfa-miR-103	-0.11	0.54
CHD6	NM_032221	chromodomain helicase DNA binding protein 6	cfa-miR-103	-0.3	0.53
KRT85	NM_002283	keratin 85	cfa-miR-103	-0.27	0.53
ERLIN1	NM_001100626	ER lipid raft associated 1	cfa-miR-103	-0.23	0.53
SLC35B2	NM_178148	solute carrier family 35, member B2	cfa-miR-103	-0.22	0.53
LTBP2	NM_000428	latent transforming growth factor beta binding protein 2	cfa-miR-103	-0.21	0.53
UBR3	NM_172070	ubiquitin protein ligase E3 component n-recognin 3 (putative)	cfa-miR-103	-0.2	0.53
FAM189A1	NM_015307	family with sequence similarity 189, member A1	cfa-miR-103	-0.2	0.53
TNFAIP3	NM_006290	tumor necrosis factor, alpha-induced protein 3	cfa-miR-103	-0.14	0.53
USP47	NM_017944	ubiquitin specific peptidase 47	cfa-miR-103	-0.14	0.53
BAZ2B	NM_013450	bromodomain adjacent to zinc finger domain, 2B	cfa-miR-103	-0.13	0.53
OGT	NM_181672	O-linked N-acetylglucosamine (GlcNAc) transferase (UDP-N-acetylglucosamine:polypeptide-N-acetylglucosaminyl transferase)	cfa-miR-103	-0.13	0.53
CHRM1	NM_000738	cholinergic receptor, muscarinic 1	cfa-miR-103	-0.08	0.53
RC3H1	NM_172071	ring finger and CCCH-type domains 1	cfa-miR-103	-0.07	0.53
CLSPN	NM_001190481	claspin	cfa-miR-103	-0.07	0.53
IKZF4	NM_022465	IKAROS family zinc finger 4 (Eos)	cfa-miR-103	> -0.04	0.53
BTLA	NM_001085357	B and T lymphocyte associated	cfa-miR-103	-0.42	0.52
ACTG1	NM_001199954	actin, gamma 1	cfa-miR-103	-0.38	0.52
GALNT13	NM_052917	UDP-N-acetyl-alpha-D-galactosamine:polypeptide N-acetylgalactosaminyltransferase 13 (GalNAc-T13)	cfa-miR-103	-0.29	0.52
CREB5	NM_001011666	cAMP responsive element binding protein 5	cfa-miR-103	-0.24	0.52
D4S234E	NM_001040101	DNA segment on chromosome 4 (unique) 234 expressed sequence	cfa-miR-103	-0.21	0.52
LATS2	NM_014572	LATS, large tumor suppressor, homolog 2 (Drosophila)	cfa-miR-103	-0.2	0.52
EBF1	NM_024007	early B-cell factor 1	cfa-miR-103	-0.2	0.52
HSDL1	NM_001146051	hydroxysteroid dehydrogenase like 1	cfa-miR-103	-0.19	0.52
FAM190A	NM_001145065	family with sequence similarity 190, member A	cfa-miR-103	-0.18	0.52
LYPD3	NM_014400	LY6/PLAUR domain containing 3	cfa-miR-103	-0.14	0.52
TMEM25	NM_001144034	transmembrane protein 25	cfa-miR-103	-0.11	0.52
FAM49A	NM_030797	family with sequence similarity 49, member A	cfa-miR-103	-0.1	0.52
2015-09-06	NM_145799	septin 6	cfa-miR-103	N/A	0.52
C2orf71	NM_001029883	chromosome 2 open reading frame 71	cfa-miR-103	-0.28	0.51
DCUN1D3	NM_173475	DCN1, defective in cullin neddylation 1, domain containing 3 (S. cerevisiae)	cfa-miR-103	-0.27	0.51
TMEM52	NM_178545	transmembrane protein 52	cfa-miR-103	-0.23	0.51
PRMT8	NM_019854	protein arginine methyltransferase 8	cfa-miR-103	-0.23	0.51
NKTR	NM_005385	natural killer-tumor recognition sequence	cfa-miR-103	-0.22	0.51
PCDH17	NM_001040429	protocadherin 17	cfa-miR-103	-0.22	0.51
TMEM135	NM_001168724	transmembrane protein 135	cfa-miR-103	-0.21	0.51
PAQR9	NM_198504	progestin and adipoQ receptor family member IX	cfa-miR-103	-0.16	0.51
MGST2	NM_001204366	microsomal glutathione S-transferase 2	cfa-miR-103	-0.15	0.51
FAM40A	NM_033088	family with sequence similarity 40, member A	cfa-miR-103	-0.14	0.51
HUWE1	NM_031407	HECT, UBA and WWE domain containing 1	cfa-miR-103	-0.14	0.51
HOXA7	NM_006896	homeobox A7	cfa-miR-103	-0.13	0.51
ST8SIA4	NM_005668	ST8 alpha-N-acetyl-neuraminide alpha-2,8-sialyltransferase 4	cfa-miR-103	-0.12	0.51
HTR4	NM_000870	5-hydroxytryptamine (serotonin) receptor 4	cfa-miR-103	-0.11	0.51
ADD1	NM_001119	adducin 1 (alpha)	cfa-miR-103	-0.11	0.51
BTG2	NM_006763	BTG family, member 2	cfa-miR-103	-0.06	0.51
MLL2	NM_003482	myeloid/lymphoid or mixed-lineage leukemia 2	cfa-miR-103	-0.04	0.51
PDCD10	NM_007217	programmed cell death 10	cfa-miR-103	-0.43	0.5
NEDD9	NM_001142393	neural precursor cell expressed, developmentally down-regulated 9	cfa-miR-103	-0.36	0.5
SLC45A4	NM_001080431	solute carrier family 45, member 4	cfa-miR-103	-0.26	0.5
TMEM33	NM_018126	transmembrane protein 33	cfa-miR-103	-0.26	0.5
KCND1	NM_004979	potassium voltage-gated channel, Shal-related subfamily, member 1	cfa-miR-103	-0.21	0.5
PITPNA	NM_006224	phosphatidylinositol transfer protein, alpha	cfa-miR-103	-0.15	0.5
REST	NM_001193508	RE1-silencing transcription factor	cfa-miR-103	-0.11	0.5
ZNF687	NM_020832	zinc finger protein 687	cfa-miR-103	-0.11	0.5
UHMK1	NM_001184763	U2AF homology motif (UHM) kinase 1	cfa-miR-103	-0.11	0.5
ANKRD44	NM_001195144	ankyrin repeat domain 44	cfa-miR-103	-0.1	0.5
ELAVL3	NM_001420	ELAV (embryonic lethal, abnormal vision, Drosophila)-like 3 (Hu antigen C)	cfa-miR-103	-0.06	0.5
ZC3H12B	NM_001010888	zinc finger CCCH-type containing 12B	cfa-miR-103	> -0.02	0.5
CYBB	NM_000397	cytochrome b-245, beta polypeptide	cfa-miR-103	-0.37	0.49
ZBTB34	NM_001099270	zinc finger and BTB domain containing 34	cfa-miR-103	-0.31	0.49
WIPI2	NM_001033518	WD repeat domain, phosphoinositide interacting 2	cfa-miR-103	-0.27	0.49
ACTR2	NM_001005386	ARP2 actin-related protein 2 homolog (yeast)	cfa-miR-103	-0.25	0.49
GATAD2B	NM_020699	GATA zinc finger domain containing 2B	cfa-miR-103	-0.21	0.49
CLCN5	NM_000084	chloride channel 5	cfa-miR-103	-0.19	0.49
FAM190B	NM_018999	family with sequence similarity 190, member B	cfa-miR-103	-0.17	0.49
C17orf85	NM_001114118	chromosome 17 open reading frame 85	cfa-miR-103	-0.16	0.49
NUFIP2	NM_020772	nuclear fragile X mental retardation protein interacting protein 2	cfa-miR-103	-0.14	0.49
MAP4	NM_030885	microtubule-associated protein 4	cfa-miR-103	-0.13	0.49
MTMR4	NM_004687	myotubularin related protein 4	cfa-miR-103	-0.13	0.49
LRRC55	NM_001005210	leucine rich repeat containing 55	cfa-miR-103	-0.12	0.49
PPP2R5C	NM_001161725	protein phosphatase 2, regulatory subunit B', gamma	cfa-miR-103	-0.11	0.49
TJP1	NM_003257	tight junction protein 1 (zona occludens 1)	cfa-miR-103	-0.48	0.48
MYBL1	NM_001080416	v-myb myeloblastosis viral oncogene homolog (avian)-like 1	cfa-miR-103	-0.46	0.48
HIGD1A	NM_001099668	HIG1 hypoxia inducible domain family, member 1A	cfa-miR-103	-0.39	0.48
FZD4	NM_012193	frizzled family receptor 4	cfa-miR-103	-0.31	0.48
SALL4	NM_020436	sal-like 4 (Drosophila)	cfa-miR-103	-0.3	0.48
ST13	NM_003932	suppression of tumorigenicity 13 (colon carcinoma) (Hsp70 interacting protein)	cfa-miR-103	-0.27	0.48
SH2D2A	NM_001161441	SH2 domain containing 2A	cfa-miR-103	-0.23	0.48
UBE2J1	NM_016021	ubiquitin-conjugating enzyme E2, J1, U	cfa-miR-103	-0.21	0.48
C6orf64	NM_018322	chromosome 6 open reading frame 64	cfa-miR-103	-0.18	0.48
SMCHD1	NM_015295	structural maintenance of chromosomes flexible hinge domain containing 1	cfa-miR-103	-0.17	0.48
EOMES	NM_005442	eomesodermin	cfa-miR-103	-0.16	0.48
CCNJ	NM_001134375	cyclin J	cfa-miR-103	-0.14	0.48
JAK1	NM_002227	Janus kinase 1	cfa-miR-103	-0.13	0.48
MAP3K3	NM_002401	mitogen-activated protein kinase kinase kinase 3	cfa-miR-103	-0.34	0.47
SMARCE1	NM_003079	SWI/SNF related, matrix associated, actin dependent regulator of chromatin, subfamily e, member 1	cfa-miR-103	-0.34	0.47
PAPD5	NM_001040284	PAP associated domain containing 5	cfa-miR-103	-0.24	0.47
DCAF5	NM_003861	DDB1 and CUL4 associated factor 5	cfa-miR-103	-0.22	0.47
ESRRA	NM_004451	estrogen-related receptor alpha	cfa-miR-103	-0.21	0.47
SNCG	NM_003087	synuclein, gamma (breast cancer-specific protein 1)	cfa-miR-103	-0.18	0.47
RFX7	NM_022841	regulatory factor X, 7	cfa-miR-103	-0.17	0.47
SEMA4F	NM_004263	sema domain, immunoglobulin domain (Ig), transmembrane domain (TM) and short cytoplasmic domain, (semaphorin) 4F	cfa-miR-103	-0.16	0.47
SESN2	NM_031459	sestrin 2	cfa-miR-103	-0.07	0.47
MGA	NM_001080541	MAX gene associated	cfa-miR-103	-0.06	0.47
SF3A1	NM_001005409	splicing factor 3a, subunit 1, 120kDa	cfa-miR-103	-0.06	0.47
MIB1	NM_020774	mindbomb homolog 1 (Drosophila)	cfa-miR-103	-0.03	0.47
SETD1B	NM_015048	SET domain containing 1B	cfa-miR-103	-0.29	0.46
PAIP2B	NM_020459	poly(A) binding protein interacting protein 2B	cfa-miR-103	-0.28	0.46
SATB2	NM_001172509	SATB homeobox 2	cfa-miR-103	-0.27	0.46
TRPV3	NM_145068	transient receptor potential cation channel, subfamily V, member 3	cfa-miR-103	-0.27	0.46
STAG1	NM_005862	stromal antigen 1	cfa-miR-103	-0.22	0.46
PDK4	NM_002612	pyruvate dehydrogenase kinase, isozyme 4	cfa-miR-103	-0.21	0.46
CELF2	NM_001025076	CUGBP, Elav-like family member 2	cfa-miR-103	-0.17	0.46
FSTL4	NM_015082	follistatin-like 4	cfa-miR-103	-0.17	0.46
FRMD4A	NM_018027	FERM domain containing 4A	cfa-miR-103	-0.17	0.46
LEPREL1	NM_001134418	leprecan-like 1	cfa-miR-103	-0.15	0.46
FCHSD1	NM_033449	FCH and double SH3 domains 1	cfa-miR-103	-0.14	0.46
EPM2AIP1	NM_014805	EPM2A (laforin) interacting protein 1	cfa-miR-103	-0.14	0.46
BSDC1	NM_001143888	BSD domain containing 1	cfa-miR-103	-0.14	0.46
VOPP1	NM_030796	vesicular, overexpressed in cancer, prosurvival protein 1	cfa-miR-103	-0.04	0.46
RBM24	NM_001143941	RNA binding motif protein 24	cfa-miR-103	-0.57	0.45
PRKAR1B	NM_001164758	protein kinase, cAMP-dependent, regulatory, type I, beta	cfa-miR-103	-0.44	0.45
CDK14	NM_012395	cyclin-dependent kinase 14	cfa-miR-103	-0.34	0.45
WWP1	NM_007013	WW domain containing E3 ubiquitin protein ligase 1	cfa-miR-103	-0.17	0.45
HS6ST1	NM_004807	heparan sulfate 6-O-sulfotransferase 1	cfa-miR-103	-0.16	0.45
C7orf42	NM_017994	chromosome 7 open reading frame 42	cfa-miR-103	-0.14	0.45
FAM189B	NM_006589	family with sequence similarity 189, member B	cfa-miR-103	-0.14	0.45
DUSP15	NM_001012644	dual specificity phosphatase 15	cfa-miR-103	-0.1	0.45
SEMA6A	NM_020796	sema domain, transmembrane domain (TM), and cytoplasmic domain, (semaphorin) 6A	cfa-miR-103	-0.08	0.45
CGGBP1	NM_001008390	CGG triplet repeat binding protein 1	cfa-miR-103	-0.04	0.45
WDR20	NM_001242416	WD repeat domain 20	cfa-miR-103	-0.32	0.44
C5orf13	NM_001142474	chromosome 5 open reading frame 13	cfa-miR-103	-0.28	0.44
FRK	NM_002031	fyn-related kinase	cfa-miR-103	-0.24	0.44
HOXD10	NM_002148	homeobox D10	cfa-miR-103	-0.17	0.44
RGS4	NM_001102445	regulator of G-protein signaling 4	cfa-miR-103	-0.16	0.44
C15orf29	NM_024713	chromosome 15 open reading frame 29	cfa-miR-103	-0.16	0.44
HOXC10	NM_017409	homeobox C10	cfa-miR-103	-0.12	0.44
GRIA4	NM_000829	glutamate receptor, ionotrophic, AMPA 4	cfa-miR-103	-0.11	0.44
LUZP1	NM_001142546	leucine zipper protein 1	cfa-miR-103	-0.09	0.44
ATL2	NM_022374	atlastin GTPase 2	cfa-miR-103	-0.39	0.43
RS1	NM_000330	retinoschisin 1	cfa-miR-103	-0.33	0.43
TACSTD2	NM_002353	tumor-associated calcium signal transducer 2	cfa-miR-103	-0.3	0.43
HOXA10	NM_018951	homeobox A10	cfa-miR-103	-0.28	0.43
SLN	NM_003063	sarcolipin	cfa-miR-103	-0.19	0.43
IGSF9B	NM_014987	immunoglobulin superfamily, member 9B	cfa-miR-103	-0.17	0.43
AGPAT6	NM_178819	1-acylglycerol-3-phosphate O-acyltransferase 6 (lysophosphatidic acid acyltransferase, zeta)	cfa-miR-103	-0.15	0.43
RASL12	NM_016563	RAS-like, family 12	cfa-miR-103	-0.14	0.43
CAMKV	NM_024046	CaM kinase-like vesicle-associated	cfa-miR-103	-0.12	0.43
GRID1	NM_017551	glutamate receptor, ionotropic, delta 1	cfa-miR-103	-0.11	0.43
SNX3	NM_003795	sorting nexin 3	cfa-miR-103	-0.35	0.42
PNISR	NM_015491	PNN-interacting serine/arginine-rich protein	cfa-miR-103	-0.23	0.42
SALL1	NM_001127892	sal-like 1 (Drosophila)	cfa-miR-103	-0.22	0.42
SPTBN4	NM_020971	spectrin, beta, non-erythrocytic 4	cfa-miR-103	-0.15	0.42
UQCC	NM_001184977	ubiquinol-cytochrome c reductase complex chaperone	cfa-miR-103	-0.25	0.41
FGF18	NM_003862	fibroblast growth factor 18	cfa-miR-103	-0.15	0.41
PRKAB2	NM_005399	protein kinase, AMP-activated, beta 2 non-catalytic subunit	cfa-miR-103	-0.13	0.41
BLMH	NM_000386	bleomycin hydrolase	cfa-miR-103	-0.12	0.41
NMT1	NM_021079	N-myristoyltransferase 1	cfa-miR-103	> -0.03	0.41
TRIM9	NM_015163	tripartite motif containing 9	cfa-miR-103	-0.27	0.4
ANKIB1	NM_019004	ankyrin repeat and IBR domain containing 1	cfa-miR-103	-0.18	0.4
MN1	NM_002430	meningioma (disrupted in balanced translocation) 1	cfa-miR-103	-0.15	0.4
GTPBP2	NM_019096	GTP binding protein 2	cfa-miR-103	-0.11	0.4
SH3BP5	NM_001018009	SH3-domain binding protein 5 (BTK-associated)	cfa-miR-103	-0.38	0.39
PDIK1L	NM_152835	PDLIM1 interacting kinase 1 like	cfa-miR-103	-0.3	0.39
SPIN1	NM_006717	spindlin 1	cfa-miR-103	-0.24	0.39
TBC1D8B	NM_017752	TBC1 domain family, member 8B (with GRAM domain)	cfa-miR-103	-0.2	0.39
RSPO3	NM_032784	R-spondin 3	cfa-miR-103	-0.19	0.39
FIGF	NM_004469	c-fos induced growth factor (vascular endothelial growth factor D)	cfa-miR-103	-0.19	0.39
RFWD3	NM_018124	ring finger and WD repeat domain 3	cfa-miR-103	-0.12	0.39
SH3GL2	NM_003026	SH3-domain GRB2-like 2	cfa-miR-103	-0.35	0.38
ZNF398	NM_020781	zinc finger protein 398	cfa-miR-103	-0.27	0.38
PRTG	NM_173814	protogenin	cfa-miR-103	-0.1	0.38
ADNP2	NM_014913	ADNP homeobox 2	cfa-miR-103	-0.26	0.37
SPRY1	NM_005841	sprouty homolog 1, antagonist of FGF signaling (Drosophila)	cfa-miR-103	-0.18	0.37
PANK4	NM_018216	pantothenate kinase 4	cfa-miR-103	-0.14	0.37
SLC9A8	NM_015266	solute carrier family 9 (sodium/hydrogen exchanger), member 8	cfa-miR-103	-0.58	0.36
TGFBR2	NM_001024847	transforming growth factor, beta receptor II (70/80kDa)	cfa-miR-103	-0.33	0.36
ITGA2	NM_002203	integrin, alpha 2 (CD49B, alpha 2 subunit of VLA-2 receptor)	cfa-miR-103	-0.2	0.36
DYNC1LI2	NM_006141	dynein, cytoplasmic 1, light intermediate chain 2	cfa-miR-103	-0.19	0.36
MYB	NM_001130172	v-myb myeloblastosis viral oncogene homolog (avian)	cfa-miR-103	-0.19	0.36
UBE2O	NM_022066	ubiquitin-conjugating enzyme E2O	cfa-miR-103	-0.15	0.36
EIF2S1	NM_004094	eukaryotic translation initiation factor 2, subunit 1 alpha, 35kDa	cfa-miR-103	-0.14	0.36
UBFD1	NM_019116	ubiquitin family domain containing 1	cfa-miR-103	-0.08	0.36
SNX18	NM_001102575	sorting nexin 18	cfa-miR-103	-0.07	0.36
SH3BP5L	NM_030645	SH3-binding domain protein 5-like	cfa-miR-103	-0.28	0.35
SLC31A1	NM_001859	solute carrier family 31 (copper transporters), member 1	cfa-miR-103	-0.27	0.35
FEM1C	NM_020177	fem-1 homolog c (C. elegans)	cfa-miR-103	-0.13	0.35
TOB2	NM_016272	transducer of ERBB2, 2	cfa-miR-103	-0.03	0.35
RTKN2	NM_145307	rhotekin 2	cfa-miR-103	> -0.03	0.35
TBL1XR1	NM_024665	transducin (beta)-like 1 X-linked receptor 1	cfa-miR-103	> -0.02	0.35
CAPZA2	NM_006136	capping protein (actin filament) muscle Z-line, alpha 2	cfa-miR-103	-0.24	0.34
KCNIP2	NM_014591	Kv channel interacting protein 2	cfa-miR-103	-0.12	0.34
PLEKHF2	NM_024613	pleckstrin homology domain containing, family F (with FYVE domain) member 2	cfa-miR-103	-0.35	0.31
LONRF3	NM_001031855	LON peptidase N-terminal domain and ring finger 3	cfa-miR-103	-0.35	0.3
ST3GAL2	NM_006927	ST3 beta-galactoside alpha-2,3-sialyltransferase 2	cfa-miR-103	-0.28	0.3
HEG1	NM_020733	HEG homolog 1 (zebrafish)	cfa-miR-103	-0.18	0.28
IGSF3	NM_001007237	immunoglobulin superfamily, member 3	cfa-miR-103	-0.17	0.28
UGGT1	NM_020120	UDP-glucose glycoprotein glucosyltransferase 1	cfa-miR-103	-0.21	0.23
NR1D2	NM_001145425	nuclear receptor subfamily 1, group D, member 2	cfa-miR-103	-0.09	0.22
PDE8B	NM_001029851	phosphodiesterase 8B	cfa-miR-103	-0.82	0.21
SCN1A	NM_001165963	sodium channel, voltage-gated, type I, alpha subunit	cfa-miR-103	-0.25	0.2
CAB39	NM_001130849	calcium binding protein 39	cfa-miR-103	-0.25	0.17
TRIAP1	NM_016399	TP53 regulated inhibitor of apoptosis 1	cfa-miR-103	-0.45	0.14
RAB11FIP2	NM_014904	RAB11 family interacting protein 2 (class I)	cfa-miR-103	-0.39	0.14
TNPO1	NM_002270	transportin 1	cfa-miR-103	-0.1	0.14
RAB1B	NM_030981	RAB1B, member RAS oncogene family	cfa-miR-103	-0.3	0.13
CISD1	NM_018464	CDGSH iron sulfur domain 1	cfa-miR-103	N/A	0.13
TMEM47	NM_031442	transmembrane protein 47	cfa-miR-103	-0.39	0.12
ENSA	NM_207043	endosulfine alpha	cfa-miR-103	-0.53	0.11
ZBTB10	NM_001105539	zinc finger and BTB domain containing 10	cfa-miR-103	-0.4	0.11
PELI2	NM_021255	pellino homolog 2 (Drosophila)	cfa-miR-103	> -0.03	0.11
GOPC	NM_001017408	golgi-associated PDZ and coiled-coil motif containing	cfa-miR-103	-0.28	0.1
a The representative miRNA is the miRNA in its family with the most favorable (lowest) total context+ score (Garcia et al., 2011).
b PCT is the probability of a site that is conserved due to selective maintenance of miRNA targeting rather than by chance (Freidman et al., 2009).

## Sheet: Table S3
Table S3. Characteristics of dogs in the three study groups: Normal dogs at risk of heart disease (Stage A; n = 6), asymptomatic dogs with degenerative mitral valve disease (DMVD) and mild to moderate cardiac enlargement (Stage B1/B2; n = 6) and dogs with DMVD and congestive heart failure requiring multiple cardiac medications (Stage C/D; n = 6) (Atkins et al., 2009).
				Stage A		StageB1/B2		Stage C/D
N				6		6		6
Sex (n)
	Castrated male			2		2		2
	Spayed female			4		4		4
Breed (n)
	Beagle			1		1		1
	Chihuahua			0		0		1
	Dachshund			0		0		1
	Golden retriever			0		1		0
	Jack Russell terrier			1		1		0
	Labrador retriever			1		0		1
	Maltese			1		0		0
	Miniature schnauzer			0		1		0
	Poodle			1		1		0
	Pug			1		0		0
	Sheltie			0		1		0
	Shih Tzu			0		0		1
	Yorkshire terrier			0		0		1
Age (years; mean± SD)				8.5 ± 2.7		10.9 ± 2.7		10.3 ± 3.4
Weight (kg; mean ±SD)				10.1±13.6		13.5±8.8		10.4±6.3
	Range			2.2-37.4		6.1-28.6		4.3-21.3
	Median			5.2		9.9		7.7
